# Supplementary material for: Carbon dots analysis of charge transfer intrinsic capacity based on the analytic calculation of chemical reactivity descriptors
Source: Royal Society of Chemistry journal article supplement (doi:10.1039/d4nj01100g), 2024-01-01
Supplement: d4nj01100g1.pdf [file d4nj01100g1.pdf]

# Supporting Information for

## Carbon dots analysis of charge transfer intrinsic capacity based on the analytic calculation of chemical reactivity descriptors

Jesús A. Lara-Cerón,<sup>†</sup> Roberto Flores-Moreno,<sup>\*,†</sup> José A. Flores-Ramos,<sup>‡</sup> and Gururaj K. Jayaprakash<sup>¶</sup>

<sup>†</sup>*Departamento de Química, Universidad de Guadalajara, Blvd. Marcelino García Barragán 1421, C.P. 44430, Guadalajara, Jalisco, México.*

<sup>‡</sup>*Departamento de Ingeniería de Proyectos, Universidad de Guadalajara, Blvd. Marcelino García Barragán 1421, C.P. 44430, Guadalajara, Jalisco, México.*

<sup>¶</sup>*Department of Chemistry, Nitte Meenakshi Institute of Technology, Bangalore 560064, India.*

E-mail: roberto.floresmoreno.qt@gmail.com

Table 1: Cartesian coordinates of the structure DOH0

| Atom | X         | Y          | Z         |
|------|-----------|------------|-----------|
| C    | 0.000000  | 0.000000   | 0.000000  |
| O    | 0.000000  | 0.000000   | 1.221324  |
| O    | 1.147829  | 0.000000   | -0.743778 |
| H    | 1.887782  | -0.036655  | -0.099578 |
| C    | -1.250283 | 0.014187   | -0.894328 |
| N    | -2.456890 | 0.501151   | -0.221795 |
| H    | -2.720535 | -0.160702  | 0.514953  |
| H    | -2.249005 | 1.381648   | 0.260303  |
| C    | -1.485101 | -1.380135  | -1.464311 |
| C    | -1.701589 | -1.549757  | -2.834773 |
| C    | -1.519387 | -2.489163  | -0.608067 |
| C    | -1.777054 | -3.774147  | -1.114722 |
| C    | -1.957993 | -2.820559  | -3.384223 |
| C    | -1.997772 | -3.955812  | -2.514040 |
| C    | -2.252754 | -5.249117  | -3.052939 |
| C    | -2.474454 | -5.430965  | -4.452002 |
| C    | -2.721691 | -6.717918  | -4.959476 |
| C    | -2.755518 | -7.825632  | -4.105471 |
| C    | -2.546657 | -7.655633  | -2.731110 |
| C    | -2.290589 | -6.384567  | -2.182806 |
| C    | -2.182688 | -3.016358  | -4.785028 |
| C    | -2.431173 | -4.263952  | -5.299929 |
| O    | -2.654208 | -4.496313  | -6.636964 |
| H    | -2.601506 | -3.645858  | -7.110684 |
| C    | -2.071725 | -6.188403  | -0.780837 |
| C    | -1.824256 | -4.940709  | -0.265921 |
| O    | -1.607341 | -4.706036  | 1.071342  |
| H    | -1.659949 | -5.555390  | 1.547147  |
| H    | -2.880502 | -6.846537  | -6.030132 |
| C    | -2.981347 | -9.221058  | -4.679087 |
| N    | -1.719868 | -9.965759  | -4.725833 |
| H    | -1.348165 | -10.058210 | -3.775227 |
| H    | -1.896728 | -10.922292 | -5.049245 |
| H    | -1.336655 | -2.369503  | 0.461099  |
| C    | -4.088295 | -9.923653  | -3.878769 |
| O    | -3.909711 | -10.713987 | -2.963546 |
| O    | -5.332353 | -9.560736  | -4.314075 |
| H    | -5.970695 | -10.025974 | -3.730789 |
| H    | -1.678021 | -0.679822  | -3.495638 |
| H    | -2.591566 | -8.519914  | -2.062762 |
| H    | -2.153631 | -2.145596  | -5.446573 |
| H    | -2.104794 | -7.058918  | -0.119088 |
| H    | -3.353045 | -9.106318  | -5.708999 |
| H    | -1.025669 | 0.689775   | -1.735371 |

Table 2: Cartesian coordinates of the structure DOHN1

| Atom | X         | Y          | Z         |
|------|-----------|------------|-----------|
| C    | 0.000000  | 0.000000   | 0.000000  |
| O    | 0.000000  | 0.000000   | 1.221956  |
| O    | 1.148498  | 0.000000   | -0.741861 |
| H    | 1.887457  | -0.035034  | -0.096451 |
| C    | -1.251520 | 0.006432   | -0.893977 |
| N    | -2.443179 | 0.548674   | -0.235001 |
| H    | -2.710108 | -0.067507  | 0.538927  |
| H    | -2.214106 | 1.449289   | 0.197751  |
| C    | -1.507892 | -1.408784  | -1.395754 |
| C    | -1.635026 | -1.652590  | -2.754105 |
| C    | -1.656784 | -2.459673  | -0.456187 |
| C    | -1.934693 | -3.769073  | -0.863078 |
| C    | -1.900084 | -2.968901  | -3.212360 |
| C    | -2.028844 | -4.038251  | -2.272607 |
| C    | -2.324199 | -5.346279  | -2.703063 |
| N    | -2.562760 | -5.628169  | -4.021368 |
| N    | -2.498786 | -6.405341  | -1.788099 |
| C    | -2.436022 | -6.120499  | -0.448934 |
| C    | -2.177250 | -4.861316  | 0.037016  |
| O    | -2.621711 | -7.226597  | 0.330891  |
| C    | -2.394549 | -4.603042  | -4.947917 |
| C    | -2.086873 | -3.313208  | -4.579773 |
| O    | -1.949144 | -2.303669  | -5.502127 |
| H    | -2.114474 | -2.659564  | -6.394296 |
| H    | -2.481311 | -6.959305  | 1.257698  |
| C    | -2.239889 | -7.755329  | -2.279006 |
| C    | -2.523642 | -7.987150  | -3.585322 |
| C    | -2.932174 | -6.918515  | -4.435435 |
| H    | -1.785979 | -8.444856  | -1.575901 |
| H    | -2.539008 | -4.904006  | -5.983902 |
| C    | -2.307567 | -9.355614  | -4.216680 |
| N    | -1.005029 | -9.414887  | -4.888495 |
| H    | -0.267947 | -9.378628  | -4.176896 |
| H    | -0.901183 | -10.318292 | -5.361120 |
| C    | -2.518932 | -10.456970 | -3.170197 |
| O    | -1.639980 | -10.955688 | -2.482680 |
| O    | -3.826831 | -10.848254 | -3.101117 |
| H    | -3.869919 | -11.522067 | -2.388070 |
| H    | -1.552536 | -0.843295  | -3.478599 |
| H    | -2.192229 | -4.688011  | 1.113354  |
| H    | -1.563319 | -2.248363  | 0.611711  |
| H    | -2.996862 | -7.043920  | -5.512303 |
| H    | -3.092371 | -9.484749  | -4.979889 |
| H    | -1.018576 | 0.637196   | -1.765964 |

Table 3: Cartesian coordinates of the structure DOHN2

| Atom | X         | Y         | Z         |
|------|-----------|-----------|-----------|
| C    | -0.635629 | 4.817325  | -1.227847 |
| O    | -0.635629 | 4.817325  | -0.006683 |
| O    | 0.506111  | 4.817325  | -1.973675 |
| H    | 1.245686  | 4.782011  | -1.329253 |
| C    | -1.885925 | 4.791643  | -2.105127 |
| N    | -2.998951 | 5.365913  | -1.338427 |
| H    | -3.879818 | 4.955315  | -1.657018 |
| H    | -2.881977 | 5.117525  | -0.350202 |
| C    | -2.117195 | 3.369927  | -2.598979 |
| C    | -2.144003 | 3.126573  | -3.934520 |
| N    | -2.393014 | 1.829892  | -4.444330 |
| C    | -2.416125 | 1.598295  | -5.806715 |
| C    | -2.650490 | 0.360410  | -6.334966 |
| O    | -2.676311 | 0.109564  | -7.690631 |
| C    | -2.621059 | 0.750331  | -3.557097 |
| C    | -2.862902 | -0.517796 | -4.090360 |
| N    | -3.083784 | -1.599042 | -3.204311 |
| C    | -3.047762 | -1.371407 | -1.841263 |
| C    | -2.810474 | -0.134161 | -1.312823 |
| O    | -2.768764 | 0.113206  | 0.042496  |
| C    | -3.359902 | -2.889998 | -3.709243 |
| C    | -3.380991 | -3.135555 | -5.045781 |
| H    | -2.491096 | 0.936401  | -8.171872 |
| H    | -2.921282 | -0.719958 | 0.524461  |
| C    | -2.583903 | 1.023203  | -2.151184 |
| C    | -2.343567 | 2.297598  | -1.662056 |
| C    | -2.892752 | -0.793392 | -5.495575 |
| C    | -3.133592 | -2.068717 | -5.979830 |
| C    | -3.635928 | -4.538953 | -5.576641 |
| N    | -2.362728 | -5.230848 | -5.811450 |
| H    | -1.909011 | -5.407246 | -4.909428 |
| H    | -2.535568 | -6.147679 | -6.235827 |
| H    | -3.126718 | -2.261808 | -7.049806 |
| C    | -4.590092 | -5.291833 | -4.645241 |
| O    | -4.256895 | -5.931683 | -3.655366 |
| O    | -5.891999 | -5.192548 | -5.055532 |
| H    | -6.422226 | -5.684317 | -4.391080 |
| H    | -3.540350 | -3.647903 | -2.949810 |
| H    | -1.972920 | 3.890192  | -4.691186 |
| H    | -2.314949 | 2.477737  | -0.589739 |
| H    | -2.232611 | 2.472412  | -6.431644 |
| H    | -3.222500 | -2.248382 | -1.217764 |
| H    | -4.146051 | -4.432872 | -6.546426 |
| H    | -1.674748 | 5.425995  | -2.982621 |

Table 4: Cartesian coordinates of the structure DOHN3

| Atom | X         | Y          | Z         |
|------|-----------|------------|-----------|
| C    | 0.000000  | 0.000000   | 0.000000  |
| O    | 0.000000  | 0.000000   | 1.221830  |
| O    | 1.141576  | 0.000000   | -0.745014 |
| H    | 1.881546  | -0.034652  | -0.100948 |
| C    | -1.249389 | -0.034799  | -0.875454 |
| N    | -2.347240 | 0.600760   | -0.135366 |
| H    | -3.240474 | 0.236994   | -0.476333 |
| H    | -2.269928 | 0.349391   | 0.855658  |
| C    | -1.511882 | -1.476770  | -1.299037 |
| C    | -1.580842 | -1.763368  | -2.625175 |
| C    | -1.722166 | -2.499611  | -0.313951 |
| C    | -1.991860 | -3.797813  | -0.722987 |
| C    | -2.201607 | -4.901331  | 0.174392  |
| C    | -2.467977 | -6.164267  | -0.278948 |
| N    | -2.553240 | -6.467309  | -1.619049 |
| O    | -2.677486 | -7.243787  | 0.531670  |
| C    | -2.078044 | -4.129941  | -2.120190 |
| C    | -2.351033 | -5.420278  | -2.563730 |
| C    | -2.434071 | -5.753491  | -3.960242 |
| C    | -2.704627 | -7.052132  | -4.364496 |
| C    | -2.913302 | -8.075385  | -3.382108 |
| C    | -2.841626 | -7.788746  | -2.055514 |
| C    | -2.213018 | -4.653001  | -4.859491 |
| C    | -1.945148 | -3.390391  | -4.405817 |
| N    | -1.868495 | -3.084670  | -3.066862 |
| O    | -1.726292 | -2.312545  | -5.218203 |
| H    | -1.792928 | -2.620865  | -6.140270 |
| H    | -2.589331 | -6.942530  | 1.454312  |
| C    | -3.184465 | -9.497113  | -3.855191 |
| N    | -1.923767 | -10.157506 | -4.214409 |
| H    | -1.366649 | -10.287535 | -3.363679 |
| H    | -2.114441 | -11.095429 | -4.580895 |
| H    | -1.423369 | -1.038855  | -3.415998 |
| H    | -2.977632 | -8.512589  | -1.260265 |
| C    | -4.012981 | -10.264204 | -2.820053 |
| O    | -3.558162 | -10.926742 | -1.897897 |
| O    | -5.357001 | -10.149908 | -3.055108 |
| H    | -5.798777 | -10.649932 | -2.334626 |
| H    | -2.738529 | -7.303752  | -5.424085 |
| H    | -1.654513 | -2.262063  | 0.747637  |
| H    | -2.257888 | -4.829510  | -5.934985 |
| H    | -2.147973 | -4.726701  | 1.249871  |
| H    | -3.798907 | -9.424606  | -4.766778 |
| H    | -1.030952 | 0.550499   | -1.783444 |

Table 5: Cartesian coordinates of the structure LOH0

| Atom | X         | Y         | Z         |
|------|-----------|-----------|-----------|
| C    | 0.000000  | 0.000000  | 0.000000  |
| O    | 0.000000  | 0.000000  | 1.221320  |
| O    | 1.148072  | 0.000000  | -0.743612 |
| H    | 1.887795  | 0.036589  | -0.099111 |
| C    | -1.250510 | -0.014775 | -0.894506 |
| N    | -2.457501 | -0.498417 | -0.220454 |
| H    | -2.717771 | 0.163347  | 0.517627  |
| H    | -2.251360 | -1.380002 | 0.260453  |
| C    | -1.484443 | 1.378107  | -1.468581 |
| C    | -1.708051 | 1.543769  | -2.838240 |
| C    | -1.513866 | 2.489949  | -0.615571 |
| C    | -1.774630 | 3.773393  | -1.124633 |
| C    | -1.967946 | 2.812766  | -3.390028 |
| C    | -2.003963 | 3.950578  | -2.523174 |
| C    | -2.265008 | 5.241722  | -3.064268 |
| C    | -2.495601 | 5.419018  | -4.462515 |
| C    | -2.750887 | 6.703607  | -4.971993 |
| C    | -2.785734 | 7.813247  | -4.120498 |
| C    | -2.567205 | 7.647715  | -2.747082 |
| C    | -2.301233 | 6.379356  | -2.197161 |
| C    | -2.200817 | 3.004093  | -4.789998 |
| C    | -2.454796 | 4.249650  | -5.307109 |
| O    | -2.686876 | 4.477402  | -6.643443 |
| H    | -2.635598 | 3.625250  | -7.114381 |
| C    | -2.071277 | 6.188137  | -0.796343 |
| C    | -1.817254 | 4.942653  | -0.279348 |
| O    | -1.589579 | 4.713055  | 1.057082  |
| H    | -1.639716 | 5.564338  | 1.529784  |
| H    | -2.917503 | 6.828772  | -6.041957 |
| C    | -3.024280 | 9.205886  | -4.695999 |
| N    | -1.767600 | 9.957793  | -4.754187 |
| H    | -1.390782 | 10.057225 | -3.806284 |
| H    | -1.952320 | 10.911672 | -5.081081 |
| C    | -4.130334 | 9.903998  | -3.890390 |
| O    | -3.950834 | 10.703528 | -2.983476 |
| O    | -5.375002 | 9.526911  | -4.312375 |
| H    | -6.012279 | 9.991415  | -3.727272 |
| H    | -1.326245 | 2.373515  | 0.453167  |
| H    | -1.687883 | 0.671862  | -3.496775 |
| H    | -2.611212 | 8.513502  | -2.080521 |
| H    | -2.174348 | 2.131328  | -5.449125 |
| H    | -2.101300 | 7.060687  | -0.136998 |
| H    | -3.403232 | 9.086155  | -5.722874 |
| H    | -1.026850 | -0.693656 | -1.733269 |

Table 6: Cartesian coordinates of the structure LOHN1

| Atom | X         | Y         | Z         |
|------|-----------|-----------|-----------|
| C    | 0.000000  | 0.000000  | 0.000000  |
| O    | 0.000000  | 0.000000  | 1.221147  |
| O    | 1.141660  | 0.000000  | -0.745893 |
| H    | 1.881382  | 0.035595  | -0.101682 |
| C    | -1.250311 | 0.026324  | -0.877282 |
| N    | -2.362827 | -0.549219 | -0.111222 |
| H    | -3.244431 | -0.140021 | -0.429303 |
| H    | -2.246041 | -0.302226 | 0.877319  |
| C    | -1.481071 | 1.448896  | -1.368945 |
| C    | -1.499945 | 1.695395  | -2.704110 |
| N    | -1.745048 | 2.993299  | -3.212453 |
| C    | -1.759836 | 3.228144  | -4.574442 |
| C    | -1.987314 | 4.467927  | -5.101056 |
| O    | -2.004704 | 4.722078  | -6.456309 |
| C    | -1.975210 | 4.071531  | -2.323948 |
| C    | -2.210032 | 5.341565  | -2.855653 |
| N    | -2.433796 | 6.421410  | -1.968491 |
| C    | -2.409191 | 6.189963  | -0.605831 |
| C    | -2.178579 | 4.950779  | -0.078875 |
| O    | -2.148515 | 4.699609  | 1.276152  |
| C    | -2.699537 | 7.715057  | -2.472112 |
| C    | -2.711628 | 7.963800  | -3.808268 |
| H    | -1.819180 | 3.895848  | -6.938493 |
| H    | -2.303387 | 5.531623  | 1.759356  |
| C    | -1.947757 | 3.795054  | -0.918526 |
| C    | -1.712655 | 2.519157  | -0.431098 |
| C    | -2.230830 | 5.620486  | -4.260313 |
| C    | -2.464246 | 6.897760  | -4.743026 |
| C    | -2.956568 | 9.369912  | -4.336410 |
| N    | -1.679296 | 10.060330 | -4.552118 |
| H    | -1.235358 | 10.229617 | -3.643912 |
| H    | -1.845142 | 10.980487 | -4.972085 |
| H    | -2.450869 | 7.092935  | -5.812589 |
| C    | -3.920821 | 10.119605 | -3.412724 |
| O    | -3.598415 | 10.756173 | -2.417121 |
| O    | -5.218210 | 10.020752 | -3.836926 |
| H    | -5.755915 | 10.509542 | -3.176315 |
| H    | -2.881250 | 8.471954  | -1.711922 |
| H    | -1.323649 | 0.933655  | -3.461465 |
| H    | -1.691147 | 2.336392  | 0.640911  |
| H    | -1.575612 | 2.355002  | -5.200530 |
| H    | -2.587335 | 7.065503  | 0.018721  |
| H    | -3.455163 | 9.269355  | -5.312796 |
| H    | -1.039045 | -9.606347 | -1.755947 |

Table 7: Cartesian coordinates of the structure LOHN2

| Atom | X         | Y         | Z         |
|------|-----------|-----------|-----------|
| C    | 0.000000  | 0.000000  | 0.000000  |
| O    | 0.000000  | 0.000000  | 1.222097  |
| O    | 1.148537  | 0.000000  | -0.741999 |
| H    | 1.887440  | 0.035393  | -0.096465 |
| C    | -1.251078 | -0.006865 | -0.894242 |
| N    | -2.443067 | -0.550063 | -0.236310 |
| H    | -2.712914 | 0.067658  | 0.535393  |
| H    | -2.213485 | -1.449405 | 0.198863  |
| C    | -1.509908 | 1.407854  | -1.396410 |
| C    | -1.649119 | 1.648472  | -2.754292 |
| C    | -1.651521 | 2.460866  | -0.457880 |
| C    | -1.933753 | 3.769136  | -0.865420 |
| C    | -1.919154 | 2.963640  | -3.213195 |
| C    | -2.040110 | 4.035023  | -2.274676 |
| C    | -2.339644 | 5.341950  | -2.705511 |
| N    | -2.590922 | 5.620677  | -4.022100 |
| N    | -2.505561 | 6.403462  | -1.791666 |
| C    | -2.431122 | 6.121797  | -0.452589 |
| C    | -2.168849 | 4.863582  | 0.034095  |
| O    | -2.609299 | 7.229975  | 0.326059  |
| C    | -2.430003 | 4.593807  | -4.948185 |
| C    | -2.117876 | 3.304884  | -4.579872 |
| O    | -1.986875 | 2.293240  | -5.501241 |
| H    | -2.160816 | 2.646659  | -6.392769 |
| H    | -2.461556 | 6.964520  | 1.252293  |
| C    | -2.249503 | 7.751742  | -2.288991 |
| C    | -2.547183 | 7.980519  | -3.592388 |
| C    | -2.965208 | 6.909788  | -4.435364 |
| H    | -1.785997 | 8.441923  | -1.592755 |
| H    | -2.582932 | 4.892606  | -5.983577 |
| C    | -2.335968 | 9.346443  | -4.230653 |
| N    | -1.048654 | 9.394974  | -4.931917 |
| H    | -0.295719 | 9.354303  | -4.237379 |
| H    | -0.948839 | 10.296630 | -5.408667 |
| C    | -2.515648 | 10.451702 | -3.182380 |
| O    | -1.617737 | 10.946543 | -2.517187 |
| O    | -3.818762 | 10.851610 | -3.084159 |
| H    | -3.840761 | 11.528486 | -2.373001 |
| H    | -1.572787 | 0.837590  | -3.477677 |
| H    | -2.174473 | 4.692989  | 1.110960  |
| H    | -1.549717 | 2.251495  | 0.609644  |
| H    | -3.041690 | 7.032336  | -5.511777 |
| H    | -3.136884 | 9.479382  | -4.976333 |
| H    | -1.016972 | 9.637048  | -1.766356 |



Table 8: Cartesian coordinates of the structure LOHN3

| Atom | X         | Y         | Z         |
|------|-----------|-----------|-----------|
| C    | 0.000000  | 0.000000  | 0.000000  |
| O    | 0.000000  | 0.000000  | 1.223199  |
| O    | 1.152393  | 0.000000  | -0.739202 |
| H    | 1.887485  | 0.042994  | -0.089584 |
| C    | -1.248336 | -0.027292 | -0.887885 |
| N    | -2.365924 | -0.790580 | -0.321375 |
| H    | -2.608019 | -0.392079 | 0.591539  |
| H    | -2.074099 | -1.757274 | -0.145960 |
| C    | -1.698444 | 1.388729  | -1.221362 |
| C    | -1.494906 | 2.401565  | -0.337984 |
| N    | -1.948674 | 3.716063  | -0.633084 |
| C    | -1.756960 | 4.750368  | 0.254967  |
| C    | -2.170099 | 6.028654  | -0.004165 |
| O    | -1.118877 | 4.365693  | 1.399945  |
| C    | -2.608073 | 3.994925  | -1.864753 |
| C    | -3.035831 | 5.289339  | -2.144121 |
| H    | -1.036362 | 5.151084  | 1.971139  |
| N    | -3.701940 | 5.565788  | -3.374020 |
| C    | -3.901571 | 4.529803  | -4.256451 |
| C    | -3.486974 | 3.251647  | -3.998642 |
| O    | -4.548251 | 4.911915  | -5.398901 |
| C    | -4.145771 | 6.884831  | -3.669724 |
| C    | -3.936753 | 7.897917  | -2.790188 |
| H    | -4.652209 | 4.119876  | -5.957120 |
| C    | -2.834422 | 6.381065  | -1.229435 |
| C    | -3.266679 | 7.662124  | -1.542615 |
| C    | -2.809691 | 2.903045  | -2.778805 |
| C    | -2.369478 | 1.625807  | -2.465433 |
| C    | -4.387843 | 9.304457  | -3.169377 |
| N    | -3.303354 | 10.284624 | -3.305433 |
| H    | -2.459120 | 9.814806  | -3.640544 |
| H    | -3.094814 | 10.679266 | -2.382356 |
| H    | -4.652813 | 6.996467  | -4.621286 |
| H    | -1.003167 | 2.292368  | 0.621935  |
| H    | -2.546534 | 0.798246  | -3.151715 |
| H    | -3.677576 | 2.474626  | -4.740146 |
| H    | -1.988253 | 6.803821  | 0.741461  |
| H    | -3.110924 | 8.480888  | -0.840272 |
| C    | -5.363875 | 9.814863  | -2.111679 |
| O    | -5.073009 | 10.570493 | -1.196420 |
| O    | -6.616352 | 9.307659  | -2.288938 |
| H    | -7.152537 | 9.651367  | -1.542090 |
| H    | -4.946347 | 9.237256  | -4.117756 |
| H    | -0.956186 | 9.508234  | -1.834827 |

Table 9: Cartesian coordinates of the structure DSH0

| Atom | X        | Y         | Z         |
|------|----------|-----------|-----------|
| S    | 0.000000 | 0.000000  | 0.000000  |
| H    | 0.000000 | 0.000000  | 1.355372  |
| C    | 1.778316 | 0.000000  | -0.168294 |
| C    | 2.619203 | 0.012909  | 0.918231  |
| C    | 4.042781 | 0.010600  | 0.772931  |
| C    | 4.899226 | 0.021285  | 1.889779  |
| C    | 6.286972 | 0.018903  | 1.735104  |
| C    | 6.842379 | 0.007462  | 0.448516  |
| C    | 6.029656 | -0.008138 | -0.699459 |
| C    | 4.606831 | -0.005382 | -0.541150 |
| C    | 3.740147 | -0.016603 | -1.669992 |
| C    | 2.317287 | -0.014987 | -1.512165 |
| C    | 1.505707 | -0.027058 | -2.660897 |
| C    | 2.059338 | -0.044940 | -3.945865 |
| C    | 3.449065 | -0.051560 | -4.101720 |
| C    | 4.304186 | -0.033334 | -2.983916 |
| C    | 5.727792 | -0.037659 | -3.129725 |
| C    | 6.568861 | -0.023789 | -2.043433 |
| S    | 8.347069 | -0.027131 | -2.210553 |
| H    | 8.346314 | -0.052345 | -3.565878 |
| H    | 0.418919 | -0.017325 | -2.554681 |
| C    | 7.192099 | -0.018470 | 2.961727  |
| N    | 7.695836 | -1.376567 | 3.178090  |
| H    | 8.213681 | -1.680628 | 2.347514  |
| H    | 8.377312 | -1.373005 | 3.943755  |
| C    | 1.146107 | -0.014332 | -5.167418 |
| N    | 1.101565 | 1.335640  | -5.735250 |
| H    | 2.043151 | 1.605956  | -6.036560 |
| H    | 0.526836 | 1.333913  | -6.583968 |
| H    | 7.929696 | 0.017917  | 0.336574  |
| C    | 1.596468 | -1.094358 | -6.163105 |
| O    | 2.322409 | -0.908527 | -7.128671 |
| O    | 1.080591 | -2.318851 | -5.844010 |
| H    | 1.441651 | -2.948524 | -6.505456 |
| C    | 8.294995 | 1.042982  | 2.820925  |
| O    | 9.448019 | 0.825971  | 2.483431  |
| O    | 7.830558 | 2.291105  | 3.129185  |
| H    | 8.582722 | 2.905365  | 2.983973  |
| H    | 4.466379 | 0.024197  | 2.892996  |
| H    | 3.887049 | -0.079862 | -5.103026 |
| H    | 2.210867 | 0.024567  | 1.931321  |
| H    | 6.135169 | -0.051411 | -4.143210 |
| H    | 0.130771 | -0.283742 | -4.837905 |
| H    | 6.586610 | 0.269120  | 3.835943  |

Table 10: Cartesian coordinates of the structure DSHN1

| Atom | X        | Y         | Z         |
|------|----------|-----------|-----------|
| S    | 0.000000 | 0.000000  | 0.000000  |
| H    | 0.000000 | 0.000000  | 1.355992  |
| C    | 1.774028 | 0.000000  | -0.179204 |
| C    | 2.624652 | 0.005993  | 0.892685  |
| N    | 3.993738 | 0.006138  | 0.760244  |
| C    | 4.825193 | 0.010418  | 1.908075  |
| C    | 6.177530 | 0.016121  | 1.797420  |
| C    | 4.569522 | 0.002853  | -0.533977 |
| C    | 3.715399 | -0.005483 | -1.640137 |
| N    | 4.289323 | -0.004002 | -2.934256 |
| C    | 5.658599 | 0.017743  | -3.068420 |
| C    | 6.509205 | 0.029118  | -1.996458 |
| C    | 3.463469 | -0.045971 | -4.083075 |
| C    | 2.110076 | -0.043724 | -3.974240 |
| C    | 6.000437 | 0.015093  | -0.636916 |
| C    | 6.797537 | 0.018024  | 0.498749  |
| C    | 2.284748 | -0.006340 | -1.538567 |
| C    | 1.492277 | -0.011250 | -2.677305 |
| S    | 8.282797 | 0.060297  | -2.175641 |
| H    | 8.281989 | 0.043765  | -3.531600 |
| C    | 7.030619 | -0.016704 | 3.060965  |
| N    | 7.914996 | -1.178790 | 3.181745  |
| H    | 7.482190 | -1.996281 | 2.746882  |
| H    | 8.793928 | -0.983061 | 2.692077  |
| C    | 1.227168 | -0.048150 | -5.214760 |
| N    | 0.861892 | 1.325341  | -5.579178 |
| H    | 1.699414 | 1.817313  | -5.906446 |
| H    | 0.202632 | 1.315891  | -6.363672 |
| H    | 0.406268 | 0.017145  | -2.602218 |
| C    | 1.905008 | -0.831674 | -6.343449 |
| O    | 2.704763 | -0.366284 | -7.145121 |
| O    | 1.497851 | -2.136635 | -6.377373 |
| H    | 1.996373 | -2.557399 | -7.111627 |
| H    | 3.999626 | -0.071668 | -5.029115 |
| H    | 4.293691 | 0.019247  | 2.857648  |
| H    | 7.883873 | 0.026157  | 0.418926  |
| H    | 2.266710 | 0.011780  | 1.921187  |
| H    | 6.014474 | 0.024401  | -4.097594 |
| C    | 7.893659 | 1.243390  | 3.103089  |
| O    | 9.068762 | 1.299064  | 2.777405  |
| O    | 7.183274 | 2.325959  | 3.529323  |
| H    | 7.796844 | 3.089990  | 3.471293  |
| H    | 0.302526 | -0.586391 | -4.955228 |
| H    | 6.350803 | 0.030467  | 3.928537  |

Table 11: Cartesian coordinates of the structure DSHN2

| Atom | X         | Y         | Z         |
|------|-----------|-----------|-----------|
| S    | -5.876905 | 0.110532  | -1.570983 |
| H    | -5.876905 | 0.110532  | -0.211035 |
| C    | -4.095732 | 0.110532  | -1.647658 |
| C    | -3.258024 | -0.053643 | -0.562935 |
| N    | -3.597736 | 0.247128  | -2.920392 |
| C    | -2.224023 | 0.386870  | -3.105325 |
| N    | -1.802233 | 0.801061  | -4.340258 |
| C    | -0.437873 | 0.897647  | -4.569154 |
| C    | 0.502666  | 0.690652  | -3.584189 |
| C    | -1.314714 | 0.203758  | -2.044407 |
| C    | 0.092151  | 0.349208  | -2.257694 |
| C    | 0.969724  | 0.176729  | -1.158059 |
| C    | 0.466473  | -0.128334 | 0.101771  |
| C    | -0.922032 | -0.250504 | 0.316635  |
| C    | -1.836992 | -0.061133 | -0.731756 |
| C    | -4.423657 | -0.063321 | -4.080994 |
| C    | -3.982350 | 0.440491  | -5.277702 |
| C    | -2.737950 | 1.090172  | -5.362607 |
| S    | 2.249002  | 0.847114  | -3.909202 |
| H    | 2.116826  | 1.157278  | -5.222238 |
| H    | -5.133873 | -0.880036 | -3.968763 |
| H    | -0.179205 | 1.166231  | -5.590609 |
| C    | -4.759296 | 0.203142  | -6.568337 |
| N    | -4.218374 | -0.952908 | -7.291321 |
| H    | -4.436168 | -1.803265 | -6.761455 |
| H    | -4.699932 | -1.050202 | -8.190729 |
| C    | -6.258995 | 0.097284  | -6.261977 |
| O    | -6.860422 | -0.944125 | -6.044966 |
| O    | -6.868597 | 1.319234  | -6.281514 |
| H    | -7.806362 | 1.158707  | -6.037929 |
| H    | 2.043853  | 0.308290  | -1.295802 |
| H    | -3.681178 | -0.159684 | 0.434570  |
| C    | 1.418838  | -0.278626 | 1.282900  |
| N    | 1.324013  | 0.883085  | 2.170007  |
| H    | 0.361989  | 0.968510  | 2.512477  |
| H    | 1.899877  | 0.725065  | 3.003078  |
| C    | 1.141777  | -1.619814 | 1.983734  |
| O    | 0.500716  | -1.761591 | 3.014164  |
| O    | 1.713220  | -2.664026 | 1.312314  |
| H    | 1.464243  | -3.474773 | 1.807105  |
| H    | -1.301598 | -0.477242 | 1.315565  |
| H    | -2.300126 | 1.407232  | -6.303653 |
| H    | -4.619521 | 1.096991  | -7.197322 |
| H    | 2.444872  | 0.330266  | 0.886561  |

Table 12: Cartesian coordinates of the structure DSHN3

| Atom | X         | Y         | Z          |
|------|-----------|-----------|------------|
| S    | -6.137114 | 0.038409  | -4.046383  |
| H    | -6.137114 | 0.038409  | -2.691731  |
| C    | -4.354597 | 0.038409  | -4.148410  |
| C    | -3.549885 | 0.011745  | -3.038565  |
| N    | -3.819406 | 0.062714  | -5.423988  |
| C    | -4.646119 | 0.150504  | -6.576976  |
| C    | -4.117796 | 0.118055  | -7.829720  |
| C    | -2.403620 | 0.014003  | -5.577293  |
| C    | -1.580345 | -0.010247 | -4.451962  |
| N    | -0.163940 | -0.069791 | -4.607064  |
| C    | 0.366072  | -0.138267 | -5.881751  |
| C    | -0.438517 | -0.119555 | -6.991958  |
| C    | 0.663640  | -0.054002 | -3.450002  |
| C    | 0.135678  | -0.020720 | -2.198438  |
| C    | -2.116530 | 0.006913  | -3.119452  |
| C    | -1.282930 | 0.001692  | -2.007763  |
| C    | -1.869095 | -0.026589 | -6.909417  |
| C    | -2.705261 | 0.010358  | -8.017598  |
| S    | 2.145253  | -0.259143 | -5.986919  |
| H    | 2.146379  | -0.245555 | -7.341196  |
| C    | 1.082033  | 0.042923  | -1.003997  |
| N    | 0.987562  | 1.270758  | -0.205200  |
| H    | 0.756195  | 2.058727  | -0.815069  |
| H    | 0.225597  | 1.168613  | 0.473377   |
| H    | 1.733496  | -0.063828 | -3.637853  |
| H    | -5.710709 | 0.248335  | -6.383907  |
| C    | -5.026738 | 0.163745  | -9.051525  |
| N    | -5.336752 | -1.199408 | -9.495462  |
| H    | -5.916172 | -1.656296 | -8.783934  |
| H    | -5.899609 | -1.168092 | -10.351302 |
| C    | -6.262404 | 1.022362  | -8.763163  |
| O    | -7.312729 | 0.611949  | -8.288374  |
| O    | -6.070840 | 2.329093  | -9.120192  |
| H    | -6.896915 | 2.799976  | -8.874418  |
| H    | -2.290510 | -0.047321 | -9.023293  |
| H    | 0.016267  | -0.185087 | -7.979306  |
| H    | -4.007931 | -0.012444 | -2.050769  |
| H    | -1.704803 | 0.008762  | -1.003020  |
| C    | 0.799348  | -1.146017 | -0.088217  |
| O    | 0.104527  | -1.105589 | 0.915615   |
| O    | 1.397612  | -2.284361 | -0.537620  |
| H    | 1.119253  | -2.996087 | 0.078581   |
| H    | 2.112177  | -0.072323 | -1.379768  |
| H    | -4.466558 | 0.664249  | -9.856557  |

Table 13: Cartesian coordinates of the structure LSH0

| Atom | X        | Y         | Z         |
|------|----------|-----------|-----------|
| S    | 0.000000 | 0.000000  | 0.000000  |
| H    | 0.000000 | 0.000000  | 1.355163  |
| C    | 1.778617 | 0.000000  | -0.166832 |
| C    | 2.618429 | -0.003341 | 0.920601  |
| C    | 4.042121 | -0.000400 | 0.776675  |
| C    | 4.897282 | -0.001610 | 1.894644  |
| C    | 6.285085 | -0.000613 | 1.741510  |
| C    | 6.841767 | 0.001478  | 0.455335  |
| C    | 6.030461 | 0.010413  | -0.693722 |
| C    | 4.607515 | 0.007099  | -0.536992 |
| C    | 3.741945 | 0.009798  | -1.666702 |
| C    | 2.319087 | 0.005432  | -1.510068 |
| C    | 1.508536 | 0.006312  | -2.659609 |
| C    | 2.062696 | 0.018349  | -3.944117 |
| C    | 3.452777 | 0.030315  | -4.099005 |
| C    | 4.307113 | 0.020654  | -2.980488 |
| C    | 5.731042 | 0.026269  | -3.124638 |
| C    | 6.571064 | 0.018757  | -2.037366 |
| S    | 8.349503 | 0.019866  | -2.202828 |
| H    | 8.349238 | 0.043104  | -3.557933 |
| H    | 0.421784 | -0.005848 | -2.553905 |
| C    | 7.189957 | 0.041546  | 2.968082  |
| N    | 7.723053 | 1.392099  | 3.159828  |
| H    | 8.253236 | 1.667274  | 2.326976  |
| H    | 8.399026 | 1.389091  | 3.930359  |
| C    | 1.151952 | -0.016921 | -5.167260 |
| N    | 1.163541 | -1.349534 | -5.775704 |
| H    | 2.113606 | -1.568471 | -6.091775 |
| H    | 0.582990 | -1.347162 | -6.620460 |
| C    | 1.558100 | 1.111079  | -6.128931 |
| O    | 2.289031 | 0.984222  | -7.099781 |
| O    | 0.996286 | 2.304104  | -5.769746 |
| H    | 1.332075 | 2.968551  | -6.410255 |
| H    | 7.929192 | -0.011211 | 0.344838  |
| C    | 8.269357 | -1.046506 | 2.846490  |
| O    | 9.425505 | -0.862016 | 2.497658  |
| O    | 7.780641 | -2.276705 | 3.188899  |
| H    | 8.518614 | -2.910338 | 3.054172  |
| H    | 4.463002 | 0.001712  | 2.897249  |
| H    | 3.891560 | 0.057680  | -5.100061 |
| H    | 2.209027 | -0.007272 | 1.933328  |
| H    | 6.139651 | 0.034443  | -4.137721 |
| H    | 0.126216 | 0.200344  | -4.831642 |
| H    | 6.578202 | 0.217007  | 3.846877  |

Table 14: Cartesian coordinates of the structure LSHN1

| Atom | X        | Y         | Z         |
|------|----------|-----------|-----------|
| S    | 0.000000 | 0.000000  | 0.000000  |
| H    | 0.000000 | 0.000000  | 1.355917  |
| C    | 1.774043 | 0.000000  | -0.179716 |
| C    | 2.624429 | -0.013385 | 0.892090  |
| N    | 3.993565 | -0.013459 | 0.759759  |
| C    | 4.824925 | -0.019020 | 1.907661  |
| C    | 6.177131 | -0.021747 | 1.797688  |
| C    | 4.569292 | -0.002518 | -0.534435 |
| C    | 3.715356 | 0.012470  | -1.640532 |
| N    | 4.289505 | 0.018389  | -2.934427 |
| C    | 5.658733 | -0.003843 | -3.068746 |
| C    | 6.509281 | -0.022342 | -1.997194 |
| C    | 3.463677 | 0.063513  | -4.083269 |
| C    | 2.110241 | 0.063224  | -3.974333 |
| C    | 6.000313 | -0.013913 | -0.637470 |
| C    | 6.797117 | -0.020040 | 0.498855  |
| C    | 2.284570 | 0.014299  | -1.539063 |
| C    | 1.492184 | 0.027138  | -2.677511 |
| S    | 8.282646 | -0.055377 | -2.177404 |
| H    | 8.280897 | -0.047869 | -3.533373 |
| C    | 7.027923 | 0.019011  | 3.060836  |
| N    | 7.873595 | 1.210971  | 3.193621  |
| H    | 7.419725 | 2.007668  | 2.740800  |
| H    | 8.762920 | 1.043936  | 2.711182  |
| C    | 1.226609 | 0.070759  | -5.214087 |
| N    | 0.839094 | -1.300248 | -5.564529 |
| H    | 1.668078 | -1.808859 | -5.888063 |
| H    | 0.178101 | -1.288778 | -6.347486 |
| H    | 0.406126 | -0.000709 | -2.602998 |
| C    | 1.913770 | 0.832174  | -6.352082 |
| O    | 2.708165 | 0.348276  | -7.148258 |
| O    | 1.522238 | 2.141612  | -6.401270 |
| H    | 2.024989 | 2.547412  | -7.141031 |
| H    | 4.000311 | 0.087657  | -5.029014 |
| H    | 4.292407 | -0.027453 | 2.856609  |
| H    | 7.883526 | -0.033450 | 0.418664  |
| H    | 2.266506 | -0.025230 | 1.920501  |
| H    | 6.014412 | -0.004821 | -4.097982 |
| C    | 7.929173 | -1.214274 | 3.092907  |
| O    | 9.104297 | -1.230115 | 2.761828  |
| O    | 7.256198 | -2.321177 | 3.516693  |
| H    | 7.894708 | -3.064138 | 3.453799  |
| H    | 0.310856 | 0.626352  | -4.959136 |
| H    | 6.350446 | -0.052732 | 3.928260  |

Table 15: Cartesian coordinates of the structure LSHN2

| Atom | X         | Y         | Z         |
|------|-----------|-----------|-----------|
| S    | 0.000000  | 0.000000  | 0.000000  |
| H    | 0.000000  | 0.000000  | 1.359971  |
| C    | 1.781050  | 0.000000  | -0.077061 |
| C    | 2.619029  | 0.168069  | 1.006897  |
| N    | 2.278568  | -0.141444 | -1.349377 |
| C    | 3.652159  | -0.282028 | -1.534269 |
| N    | 4.073920  | -0.700074 | -2.767957 |
| C    | 5.438133  | -0.797781 | -2.996752 |
| C    | 6.378891  | -0.588063 | -2.012613 |
| C    | 4.561737  | -0.095981 | -0.474127 |
| C    | 5.968462  | -0.242888 | -0.687132 |
| C    | 6.846414  | -0.068157 | 0.411849  |
| C    | 6.343508  | 0.240342  | 1.670925  |
| C    | 4.955261  | 0.365117  | 1.885387  |
| C    | 4.039880  | 0.173690  | 0.837721  |
| C    | 1.451310  | 0.162260  | -2.510853 |
| C    | 1.893305  | -0.344841 | -3.706190 |
| C    | 3.138380  | -0.992392 | -3.789654 |
| S    | 8.125073  | -0.746022 | -2.337364 |
| H    | 7.992546  | -1.058934 | -3.649521 |
| H    | 0.738870  | 0.977311  | -2.400634 |
| H    | 5.696374  | -1.069339 | -4.017532 |
| C    | 1.114178  | -0.114703 | -4.996761 |
| N    | 1.645062  | 1.045339  | -5.720695 |
| H    | 1.419233  | 1.894138  | -5.191710 |
| H    | 1.162210  | 1.137423  | -6.619993 |
| C    | -0.386211 | -0.021954 | -4.689379 |
| O    | -0.998592 | 1.014907  | -4.480166 |
| O    | -0.982167 | -1.250911 | -4.696384 |
| H    | -1.921019 | -1.098791 | -4.451660 |
| H    | 7.920394  | -0.200926 | 0.274223  |
| H    | 2.196081  | 0.277776  | 2.004103  |
| C    | 7.295476  | 0.394163  | 2.851846  |
| N    | 7.188447  | -0.756569 | 3.751641  |
| H    | 6.226189  | -0.826658 | 4.096902  |
| H    | 7.767721  | -0.596028 | 4.581887  |
| C    | 7.028896  | 1.745784  | 3.536731  |
| O    | 6.387791  | 1.904703  | 4.564385  |
| O    | 7.612692  | 2.776793  | 2.855754  |
| H    | 7.370438  | 3.595282  | 3.340895  |
| H    | 4.575650  | 0.595955  | 2.883358  |
| H    | 3.576576  | -1.313701 | -4.729066 |
| H    | 1.260701  | -1.008055 | -5.624946 |
| H    | 8.322599  | 0.432188  | 2.456827  |



Table 16: Cartesian coordinates of the structure LSHN3

| Atom | X         | Y         | Z         |
|------|-----------|-----------|-----------|
| C    | 0.000000  | 0.000000  | 0.000000  |
| O    | 0.000000  | 0.000000  | 1.221310  |
| O    | 1.138880  | 0.000000  | -0.747219 |
| H    | 1.881573  | 0.034294  | -0.106184 |
| C    | -1.252118 | 0.029568  | -0.874135 |
| N    | -2.354040 | -0.581461 | -0.121342 |
| H    | -3.245468 | -0.208801 | -0.456917 |
| H    | -2.263004 | -0.325069 | 0.867278  |
| C    | -1.500096 | 1.465736  | -1.324268 |
| C    | -1.554907 | 1.734634  | -2.654967 |
| C    | -1.728073 | 2.502050  | -0.362489 |
| C    | -2.056319 | 3.777536  | -0.805174 |
| C    | -2.312376 | 4.884846  | 0.072232  |
| C    | -2.668366 | 6.127047  | -0.386959 |
| N    | -2.798708 | 6.382682  | -1.740336 |
| C    | -2.141478 | 4.078517  | -2.207377 |
| C    | -2.496194 | 5.345173  | -2.668631 |
| C    | -2.542093 | 5.657487  | -4.069780 |
| C    | -2.921280 | 6.918983  | -4.508788 |
| C    | -3.299767 | 7.912394  | -3.553044 |
| C    | -3.243617 | 7.643978  | -2.221386 |
| C    | -2.145852 | 4.591196  | -4.946966 |
| C    | -1.804427 | 3.345184  | -4.486746 |
| N    | -1.824288 | 3.045779  | -3.137481 |
| C    | -3.739177 | 9.284385  | -4.048632 |
| N    | -2.564105 | 10.130429 | -4.285287 |
| H    | -2.855547 | 11.028898 | -4.682806 |
| H    | -2.120479 | 10.341059 | -3.385445 |
| C    | -4.764329 | 9.896990  | -3.089069 |
| O    | -4.495455 | 10.584268 | -2.113296 |
| O    | -6.048571 | 9.606670  | -3.459746 |
| S    | -2.982391 | 7.505083  | 0.704210  |
| S    | -1.296394 | 2.022360  | -5.574694 |
| H    | -6.625420 | 10.015436 | -2.777855 |
| H    | -1.423366 | 0.972441  | -3.417876 |
| H    | -3.537983 | 8.358760  | -1.458247 |
| H    | -2.102746 | 4.793572  | -6.016206 |
| H    | -2.211243 | 4.723970  | 1.144636  |
| H    | -2.926281 | 7.155168  | -5.572252 |
| H    | -1.658934 | 2.290319  | 0.704233  |
| H    | -4.248847 | 9.134576  | -5.013095 |
| H    | -1.038268 | -0.575267 | -1.770734 |
| H    | -1.519290 | 2.749800  | -6.695124 |
| H    | -2.779466 | 6.766279  | 1.821321  |

Table 17: Mulliken condensed Fukui functions, dual descriptor, and Mulliken atomic charge for DOH0.

| Atom | $f^-$  | $f^+$  | $f^0$  | $f^d$  | Charge |
|------|--------|--------|--------|--------|--------|
| C    | 0.006  | 0.010  | 0.008  | 0.003  | 0.365  |
| O    | 0.024  | 0.026  | 0.025  | 0.002  | -0.384 |
| O    | 0.002  | 0.002  | 0.002  | 0.000  | -0.352 |
| H    | 0.016  | 0.016  | 0.016  | 0.000  | 0.325  |
| C    | 0.011  | 0.007  | 0.009  | -0.004 | -0.129 |
| N    | 0.006  | 0.006  | 0.006  | 0.000  | -0.366 |
| H    | 0.003  | 0.004  | 0.003  | 0.001  | 0.204  |
| H    | 0.025  | 0.026  | 0.026  | 0.000  | 0.178  |
| C    | -0.006 | -0.006 | -0.006 | 0.000  | 0.154  |
| C    | 0.072  | 0.082  | 0.077  | 0.010  | -0.146 |
| C    | 0.081  | 0.080  | 0.080  | -0.001 | -0.213 |
| C    | 0.000  | 0.013  | 0.007  | 0.013  | 0.037  |
| C    | 0.003  | 0.003  | 0.003  | 0.000  | 0.099  |
| C    | 0.013  | 0.010  | 0.011  | -0.003 | -0.014 |
| C    | 0.013  | 0.010  | 0.011  | -0.003 | -0.016 |
| C    | 0.000  | 0.012  | 0.006  | 0.011  | 0.022  |
| C    | 0.081  | 0.081  | 0.081  | -0.001 | -0.156 |
| C    | -0.006 | -0.006 | -0.006 | 0.000  | 0.148  |
| C    | 0.071  | 0.081  | 0.076  | 0.009  | -0.195 |
| C    | 0.003  | 0.005  | 0.004  | 0.002  | 0.113  |
| C    | 0.062  | 0.051  | 0.057  | -0.011 | -0.225 |
| C    | 0.039  | 0.040  | 0.039  | 0.001  | 0.178  |
| O    | 0.035  | 0.023  | 0.029  | -0.012 | -0.367 |
| H    | 0.028  | 0.029  | 0.029  | 0.000  | 0.303  |
| C    | 0.063  | 0.051  | 0.057  | -0.012 | -0.227 |
| C    | 0.038  | 0.039  | 0.039  | 0.000  | 0.178  |
| O    | 0.035  | 0.022  | 0.029  | -0.013 | -0.366 |
| H    | 0.028  | 0.028  | 0.028  | 0.000  | 0.301  |
| H    | 0.024  | 0.025  | 0.025  | 0.001  | 0.109  |
| C    | 0.010  | 0.007  | 0.009  | -0.003 | -0.132 |
| N    | 0.004  | 0.004  | 0.004  | 0.000  | -0.364 |
| H    | 0.005  | 0.005  | 0.005  | 0.000  | 0.201  |
| H    | 0.026  | 0.026  | 0.026  | 0.000  | 0.176  |
| H    | 0.020  | 0.020  | 0.020  | 0.000  | 0.115  |
| C    | 0.008  | 0.009  | 0.008  | 0.001  | 0.365  |
| O    | 0.022  | 0.023  | 0.023  | 0.001  | -0.389 |
| O    | 0.003  | 0.004  | 0.004  | 0.001  | -0.350 |
| H    | 0.016  | 0.016  | 0.016  | 0.000  | 0.326  |
| H    | 0.024  | 0.025  | 0.024  | 0.001  | 0.077  |
| H    | 0.020  | 0.020  | 0.020  | 0.000  | 0.081  |
| H    | 0.025  | 0.025  | 0.025  | 0.000  | 0.076  |
| H    | 0.025  | 0.024  | 0.025  | 0.000  | 0.078  |
| H    | 0.011  | 0.012  | 0.012  | 0.001  | 0.094  |
| H    | 0.012  | 0.012  | 0.012  | 0.001  | 0.088  |

Table 18: Mulliken condensed Fukui functions, dual descriptor, and Mulliken atomic charge for DOHN1.

| Atom | $f^-$  | $f^+$  | $f^0$  | $f^d$  | Charge |
|------|--------|--------|--------|--------|--------|
| C    | 0.009  | 0.02   | 0.014  | 0.011  | 0.386  |
| O    | 0.024  | 0.035  | 0.029  | 0.011  | -0.396 |
| O    | 0.003  | 0.009  | 0.006  | 0.006  | -0.354 |
| H    | 0.016  | 0.019  | 0.017  | 0.003  | 0.327  |
| C    | 0.02   | 0.026  | 0.023  | 0.006  | -0.129 |
| N    | 0.025  | 0.026  | 0.026  | 0.001  | -0.365 |
| H    | -0.001 | 0.002  | 0.001  | 0.003  | 0.184  |
| H    | 0.009  | 0.01   | 0.009  | 0.001  | 0.203  |
| C    | 0.002  | 0.026  | 0.014  | 0.024  | 0.065  |
| C    | 0.049  | 0.063  | 0.056  | 0.014  | -0.090 |
| N    | 0.007  | -0.018 | -0.006 | -0.024 | -0.123 |
| C    | 0.024  | 0.045  | 0.034  | 0.021  | -0.152 |
| C    | 0.043  | 0.026  | 0.035  | -0.017 | 0.167  |
| O    | 0.018  | 0.017  | 0.018  | -0.001 | -0.365 |
| C    | 0.030  | 0.024  | 0.027  | -0.006 | 0.090  |
| C    | 0.033  | 0.026  | 0.029  | -0.007 | 0.068  |
| N    | 0.006  | -0.014 | -0.004 | -0.021 | -0.110 |
| C    | 0.022  | 0.051  | 0.037  | 0.029  | -0.166 |
| C    | 0.042  | 0.024  | 0.033  | -0.018 | 0.170  |
| O    | 0.018  | 0.016  | 0.017  | -0.002 | -0.364 |
| C    | 0.052  | 0.053  | 0.053  | 0.001  | -0.113 |
| C    | -0.003 | 0.025  | 0.011  | 0.028  | 0.139  |
| H    | 0.028  | 0.025  | 0.026  | -0.003 | 0.294  |
| H    | 0.027  | 0.025  | 0.026  | -0.002 | 0.293  |
| C    | 0.003  | 0.039  | 0.021  | 0.036  | 0.093  |
| C    | 0.099  | 0.034  | 0.067  | -0.065 | -0.194 |
| C    | 0.004  | 0.032  | 0.018  | 0.028  | 0.069  |
| C    | 0.100  | 0.047  | 0.073  | -0.053 | -0.154 |
| C    | 0.015  | 0.019  | 0.017  | 0.004  | -0.114 |
| N    | 0.001  | 0.000  | 0.000  | -0.001 | -0.374 |
| H    | 0.010  | 0.011  | 0.010  | 0.001  | 0.202  |
| H    | 0.028  | 0.028  | 0.028  | 0.000  | 0.175  |
| H    | 0.027  | 0.024  | 0.026  | -0.003 | 0.106  |
| C    | 0.016  | 0.016  | 0.016  | 0.001  | 0.354  |
| O    | 0.027  | 0.026  | 0.027  | -0.001 | -0.399 |
| O    | 0.010  | 0.010  | 0.010  | 0.000  | -0.352 |
| H    | 0.017  | 0.017  | 0.017  | 0.000  | 0.327  |
| H    | 0.017  | 0.014  | 0.016  | -0.002 | 0.061  |
| H    | 0.027  | 0.022  | 0.025  | -0.005 | 0.076  |
| H    | 0.025  | 0.023  | 0.024  | -0.002 | 0.121  |
| H    | 0.023  | 0.022  | 0.023  | -0.001 | 0.078  |
| H    | 0.023  | 0.024  | 0.023  | 0.001  | 0.082  |
| H    | 0.014  | 0.014  | 0.014  | 0.001  | 0.097  |
| H    | 0.012  | 0.015  | 0.013  | 0.003  | 0.089  |

Table 19: Mulliken condensed Fukui functions, dual descriptor, and Mulliken atomic charge for DOHN2.

| Atom | $f^-$  | $f^+$  | $f^0$  | $f^d$  | Charge |
|------|--------|--------|--------|--------|--------|
| C    | 0.009  | 0.019  | 0.014  | 0.011  | 0.367  |
| O    | 0.023  | 0.034  | 0.029  | 0.011  | -0.389 |
| O    | 0.003  | 0.007  | 0.005  | 0.004  | -0.351 |
| H    | 0.015  | 0.019  | 0.017  | 0.004  | 0.325  |
| C    | 0.014  | 0.02   | 0.017  | 0.006  | -0.127 |
| N    | 0.003  | 0.004  | 0.004  | 0.001  | -0.362 |
| H    | 0.004  | 0.006  | 0.005  | 0.003  | 0.198  |
| H    | 0.024  | 0.026  | 0.025  | 0.003  | 0.176  |
| C    | 0.007  | 0.028  | 0.018  | 0.021  | 0.160  |
| C    | 0.051  | 0.047  | 0.049  | -0.004 | -0.177 |
| C    | 0.067  | 0.030  | 0.048  | -0.037 | -0.229 |
| C    | 0.001  | 0.034  | 0.017  | 0.033  | 0.155  |
| C    | 0.028  | 0.029  | 0.028  | 0.001  | 0.042  |
| C    | 0.010  | 0.016  | 0.013  | 0.006  | -0.076 |
| C    | 0.032  | 0.049  | 0.041  | 0.017  | 0.355  |
| N    | -0.014 | 0.008  | -0.003 | 0.022  | -0.060 |
| N    | 0.005  | -0.003 | 0.001  | -0.008 | -0.155 |
| C    | 0.013  | 0.029  | 0.021  | 0.017  | 0.201  |
| C    | 0.073  | 0.032  | 0.052  | -0.041 | -0.306 |
| O    | 0.013  | 0.017  | 0.015  | 0.004  | -0.361 |
| C    | 0.036  | 0.033  | 0.035  | -0.002 | -0.193 |
| C    | 0.034  | 0.039  | 0.037  | 0.005  | 0.184  |
| O    | 0.023  | 0.021  | 0.022  | -0.002 | -0.362 |
| H    | 0.024  | 0.025  | 0.025  | 0.001  | 0.302  |
| H    | 0.025  | 0.025  | 0.025  | 0.000  | 0.303  |
| C    | 0.092  | 0.057  | 0.074  | -0.035 | -0.109 |
| C    | -0.005 | 0.025  | 0.010  | 0.030  | 0.136  |
| C    | 0.114  | 0.049  | 0.082  | -0.066 | -0.205 |
| H    | 0.026  | 0.020  | 0.023  | -0.005 | 0.113  |
| H    | 0.019  | 0.024  | 0.021  | 0.005  | 0.083  |
| C    | 0.010  | 0.020  | 0.015  | 0.010  | -0.095 |
| N    | -0.004 | -0.007 | -0.005 | -0.004 | -0.387 |
| H    | 0.011  | 0.011  | 0.011  | 0.000  | 0.203  |
| H    | 0.032  | 0.029  | 0.030  | -0.003 | 0.173  |
| C    | 0.008  | 0.011  | 0.009  | 0.003  | 0.369  |
| O    | 0.024  | 0.024  | 0.024  | 0.000  | -0.392 |
| O    | 0.006  | 0.007  | 0.007  | 0.001  | -0.353 |
| H    | 0.017  | 0.016  | 0.017  | -0.001 | 0.326  |
| H    | 0.023  | 0.024  | 0.024  | 0.001  | 0.105  |
| H    | 0.025  | 0.023  | 0.024  | -0.002 | 0.079  |
| H    | 0.020  | 0.021  | 0.020  | 0.001  | 0.080  |
| H    | 0.033  | 0.023  | 0.028  | -0.010 | 0.067  |
| H    | 0.017  | 0.014  | 0.016  | -0.003 | 0.091  |
| H    | 0.011  | 0.014  | 0.013  | 0.003  | 0.094  |

Table 20: Mulliken condensed Fukui functions, dual descriptor, and Mulliken atomic charge for DOHN3.

| Atom | $f^-$  | $f^+$  | $f^0$  | $f^d$  | Charge |
|------|--------|--------|--------|--------|--------|
| C    | 0.009  | 0.025  | 0.017  | 0.016  | 0.382  |
| O    | 0.023  | 0.038  | 0.030  | 0.015  | -0.400 |
| O    | 0.004  | 0.012  | 0.008  | 0.008  | -0.350 |
| H    | 0.016  | 0.020  | 0.018  | 0.004  | 0.326  |
| C    | 0.019  | 0.027  | 0.023  | 0.008  | -0.128 |
| N    | 0.026  | 0.027  | 0.027  | 0.001  | -0.366 |
| H    | 0.000  | 0.003  | 0.002  | 0.003  | 0.183  |
| H    | 0.009  | 0.009  | 0.009  | 0.001  | 0.201  |
| C    | -0.001 | 0.027  | 0.013  | 0.028  | 0.060  |
| C    | 0.060  | 0.070  | 0.065  | 0.010  | -0.139 |
| C    | 0.099  | 0.029  | 0.064  | -0.070 | -0.172 |
| C    | -0.002 | 0.037  | 0.018  | 0.039  | 0.152  |
| C    | 0.056  | 0.026  | 0.041  | -0.030 | -0.274 |
| C    | 0.015  | 0.039  | 0.027  | 0.024  | 0.288  |
| N    | 0.004  | -0.008 | -0.002 | -0.013 | -0.133 |
| O    | 0.016  | 0.020  | 0.018  | 0.004  | -0.362 |
| C    | 0.033  | 0.022  | 0.027  | -0.011 | 0.065  |
| C    | 0.035  | 0.026  | 0.031  | -0.008 | 0.046  |
| C    | -0.001 | 0.029  | 0.014  | 0.031  | 0.126  |
| C    | 0.101  | 0.044  | 0.073  | -0.057 | -0.131 |
| C    | -0.005 | 0.028  | 0.011  | 0.033  | 0.130  |
| C    | 0.062  | 0.056  | 0.059  | -0.006 | -0.175 |
| C    | 0.057  | 0.028  | 0.042  | -0.029 | -0.277 |
| C    | 0.016  | 0.035  | 0.025  | 0.019  | 0.292  |
| N    | 0.005  | -0.012 | -0.004 | -0.017 | -0.138 |
| O    | 0.017  | 0.018  | 0.017  | 0.001  | -0.368 |
| H    | 0.023  | 0.025  | 0.024  | 0.002  | 0.290  |
| H    | 0.023  | 0.025  | 0.024  | 0.001  | 0.284  |
| C    | 0.015  | 0.019  | 0.017  | 0.004  | -0.099 |
| N    | 0.000  | -0.001 | -0.001 | -0.001 | -0.379 |
| H    | 0.010  | 0.010  | 0.010  | 0.001  | 0.203  |
| H    | 0.028  | 0.027  | 0.028  | -0.001 | 0.173  |
| H    | 0.028  | 0.022  | 0.025  | -0.006 | 0.129  |
| H    | 0.019  | 0.016  | 0.017  | -0.003 | 0.125  |
| C    | 0.011  | 0.013  | 0.012  | 0.002  | 0.351  |
| O    | 0.026  | 0.026  | 0.026  | 0.000  | -0.390 |
| O    | 0.008  | 0.009  | 0.008  | 0.001  | -0.354 |
| H    | 0.017  | 0.017  | 0.017  | 0.000  | 0.326  |
| H    | 0.027  | 0.021  | 0.024  | -0.006 | 0.074  |
| H    | 0.026  | 0.020  | 0.023  | -0.006 | 0.084  |
| H    | 0.022  | 0.024  | 0.023  | 0.002  | 0.078  |
| H    | 0.022  | 0.023  | 0.022  | 0.001  | 0.079  |
| H    | 0.014  | 0.014  | 0.014  | 0.001  | 0.092  |
| H    | 0.012  | 0.015  | 0.013  | 0.003  | 0.095  |

Table 21: Mulliken condensed Fukui functions, dual descriptor, and Mulliken atomic charge for LOH0.

| Atom | $f^-$  | $f^+$  | $f^0$  | $f^d$  | Charge |
|------|--------|--------|--------|--------|--------|
| C    | 0.006  | 0.010  | 0.008  | 0.003  | 0.365  |
| O    | 0.024  | 0.026  | 0.025  | 0.002  | -0.384 |
| O    | 0.002  | 0.002  | 0.002  | 0.000  | -0.352 |
| H    | 0.016  | 0.016  | 0.016  | 0.000  | 0.325  |
| C    | 0.011  | 0.007  | 0.009  | -0.004 | -0.129 |
| N    | 0.006  | 0.006  | 0.006  | 0.000  | -0.366 |
| H    | 0.003  | 0.004  | 0.003  | 0.001  | 0.204  |
| H    | 0.025  | 0.026  | 0.026  | 0.000  | 0.178  |
| C    | -0.006 | -0.006 | -0.006 | 0.000  | 0.155  |
| C    | 0.072  | 0.082  | 0.077  | 0.010  | -0.146 |
| C    | 0.081  | 0.080  | 0.080  | -0.001 | -0.213 |
| C    | 0.000  | 0.013  | 0.007  | 0.013  | 0.037  |
| C    | 0.003  | 0.003  | 0.003  | 0.000  | 0.099  |
| C    | 0.013  | 0.010  | 0.011  | -0.003 | -0.014 |
| C    | 0.013  | 0.010  | 0.011  | -0.003 | -0.016 |
| C    | 0.000  | 0.012  | 0.006  | 0.011  | 0.022  |
| C    | 0.082  | 0.081  | 0.081  | -0.001 | -0.156 |
| C    | -0.006 | -0.006 | -0.006 | 0.000  | 0.149  |
| C    | 0.071  | 0.081  | 0.076  | 0.009  | -0.195 |
| C    | 0.003  | 0.005  | 0.004  | 0.002  | 0.113  |
| C    | 0.063  | 0.052  | 0.058  | -0.011 | -0.225 |
| C    | 0.038  | 0.039  | 0.039  | 0.001  | 0.178  |
| O    | 0.035  | 0.023  | 0.029  | -0.012 | -0.367 |
| H    | 0.028  | 0.029  | 0.029  | 0.000  | 0.303  |
| C    | 0.064  | 0.051  | 0.058  | -0.012 | -0.227 |
| C    | 0.038  | 0.039  | 0.039  | 0.000  | 0.178  |
| O    | 0.035  | 0.023  | 0.029  | -0.013 | -0.366 |
| H    | 0.028  | 0.028  | 0.028  | 0.000  | 0.301  |
| H    | 0.024  | 0.025  | 0.024  | 0.001  | 0.109  |
| C    | 0.010  | 0.007  | 0.008  | -0.003 | -0.133 |
| N    | 0.004  | 0.004  | 0.004  | 0.000  | -0.364 |
| H    | 0.005  | 0.005  | 0.005  | 0.000  | 0.201  |
| H    | 0.026  | 0.026  | 0.026  | 0.000  | 0.176  |
| C    | 0.008  | 0.009  | 0.008  | 0.001  | 0.365  |
| O    | 0.022  | 0.023  | 0.023  | 0.001  | -0.389 |
| O    | 0.003  | 0.004  | 0.003  | 0.001  | -0.350 |
| H    | 0.016  | 0.016  | 0.016  | 0.000  | 0.326  |
| H    | 0.020  | 0.020  | 0.020  | 0.000  | 0.115  |
| H    | 0.024  | 0.025  | 0.024  | 0.001  | 0.077  |
| H    | 0.020  | 0.020  | 0.020  | 0.000  | 0.081  |
| H    | 0.024  | 0.024  | 0.024  | 0.000  | 0.076  |
| H    | 0.024  | 0.024  | 0.024  | 0.000  | 0.077  |
| H    | 0.011  | 0.012  | 0.012  | 0.001  | 0.093  |
| H    | 0.012  | 0.012  | 0.012  | 0.001  | 0.088  |

Table 22: Mulliken condensed Fukui functions, dual descriptor, and Mulliken atomic charge for LOHN2.

| Atom | $f^-$  | $f^+$  | $f^0$  | $f^d$  | Charge |
|------|--------|--------|--------|--------|--------|
| C    | 0.009  | 0.019  | 0.014  | 0.011  | 0.367  |
| O    | 0.023  | 0.034  | 0.029  | 0.011  | -0.389 |
| O    | 0.003  | 0.007  | 0.005  | 0.004  | -0.351 |
| H    | 0.015  | 0.019  | 0.017  | 0.004  | 0.325  |
| C    | 0.014  | 0.020  | 0.017  | 0.006  | -0.126 |
| N    | 0.003  | 0.004  | 0.004  | 0.001  | -0.362 |
| H    | 0.004  | 0.006  | 0.005  | 0.002  | 0.198  |
| H    | 0.024  | 0.026  | 0.025  | 0.003  | 0.176  |
| C    | 0.007  | 0.028  | 0.018  | 0.021  | 0.160  |
| C    | 0.051  | 0.047  | 0.049  | -0.004 | -0.176 |
| C    | 0.067  | 0.030  | 0.048  | -0.037 | -0.230 |
| C    | 0.001  | 0.034  | 0.017  | 0.033  | 0.155  |
| C    | 0.028  | 0.029  | 0.028  | 0.001  | 0.042  |
| C    | 0.010  | 0.016  | 0.013  | 0.006  | -0.076 |
| C    | 0.032  | 0.049  | 0.041  | 0.017  | 0.356  |
| N    | -0.014 | 0.008  | -0.003 | 0.022  | -0.060 |
| N    | 0.005  | -0.003 | 0.001  | -0.008 | -0.155 |
| C    | 0.012  | 0.029  | 0.021  | 0.017  | 0.200  |
| C    | 0.073  | 0.032  | 0.053  | -0.041 | -0.306 |
| O    | 0.013  | 0.017  | 0.015  | 0.004  | -0.361 |
| C    | 0.036  | 0.034  | 0.035  | -0.002 | -0.193 |
| C    | 0.034  | 0.039  | 0.036  | 0.005  | 0.184  |
| O    | 0.023  | 0.021  | 0.022  | -0.002 | -0.362 |
| H    | 0.024  | 0.025  | 0.025  | 0.001  | 0.302  |
| H    | 0.025  | 0.025  | 0.025  | 0.000  | 0.303  |
| C    | 0.092  | 0.057  | 0.074  | -0.035 | -0.109 |
| C    | -0.005 | 0.025  | 0.010  | 0.030  | 0.135  |
| C    | 0.114  | 0.049  | 0.082  | -0.066 | -0.204 |
| H    | 0.026  | 0.021  | 0.023  | -0.005 | 0.112  |
| H    | 0.018  | 0.024  | 0.021  | 0.005  | 0.084  |
| C    | 0.010  | 0.020  | 0.015  | 0.010  | -0.094 |
| N    | -0.004 | -0.007 | -0.006 | -0.003 | -0.388 |
| H    | 0.011  | 0.011  | 0.011  | 0.000  | 0.203  |
| H    | 0.032  | 0.029  | 0.030  | -0.003 | 0.173  |
| C    | 0.007  | 0.011  | 0.009  | 0.003  | 0.368  |
| O    | 0.024  | 0.024  | 0.024  | 0.000  | -0.393 |
| O    | 0.006  | 0.007  | 0.007  | 0.001  | -0.353 |
| H    | 0.017  | 0.016  | 0.017  | -0.001 | 0.326  |
| H    | 0.023  | 0.024  | 0.024  | 0.001  | 0.105  |
| H    | 0.024  | 0.023  | 0.024  | -0.002 | 0.079  |
| H    | 0.020  | 0.021  | 0.020  | 0.001  | 0.081  |
| H    | 0.033  | 0.023  | 0.028  | -0.010 | 0.067  |
| H    | 0.017  | 0.014  | 0.016  | -0.003 | 0.091  |
| H    | 0.011  | 0.015  | 0.013  | 0.003  | 0.094  |

Table 23: Mulliken condensed Fukui functions, dual descriptor, and Mulliken atomic charge for LOHN3.

| Atom | $f^-$  | $f^+$  | $f^0$  | $f^d$  | Charge |
|------|--------|--------|--------|--------|--------|
| C    | 0.011  | 0.014  | 0.012  | 0.002  | 0.353  |
| O    | 0.026  | 0.026  | 0.026  | 0.000  | -0.391 |
| O    | 0.008  | 0.009  | 0.008  | 0.001  | -0.353 |
| H    | 0.017  | 0.017  | 0.017  | 0.000  | 0.326  |
| C    | 0.014  | 0.018  | 0.016  | 0.004  | -0.106 |
| N    | 0.000  | 0.000  | 0.000  | -0.001 | -0.377 |
| H    | 0.009  | 0.010  | 0.010  | 0.001  | 0.203  |
| H    | 0.028  | 0.027  | 0.028  | -0.001 | 0.174  |
| C    | -0.005 | 0.028  | 0.012  | 0.033  | 0.136  |
| C    | 0.063  | 0.057  | 0.06   | -0.006 | -0.173 |
| N    | 0.004  | -0.008 | -0.002 | -0.013 | -0.131 |
| C    | 0.015  | 0.039  | 0.027  | 0.024  | 0.286  |
| C    | 0.055  | 0.026  | 0.041  | -0.03  | -0.274 |
| O    | 0.016  | 0.020  | 0.018  | 0.004  | -0.363 |
| C    | 0.035  | 0.026  | 0.031  | -0.008 | 0.044  |
| C    | 0.033  | 0.022  | 0.027  | -0.011 | 0.066  |
| H    | 0.023  | 0.025  | 0.024  | 0.001  | 0.284  |
| N    | 0.005  | -0.012 | -0.004 | -0.017 | -0.138 |
| C    | 0.016  | 0.035  | 0.026  | 0.019  | 0.293  |
| C    | 0.057  | 0.027  | 0.042  | -0.03  | -0.277 |
| O    | 0.017  | 0.018  | 0.017  | 0.001  | -0.368 |
| C    | 0.060  | 0.069  | 0.064  | 0.009  | -0.138 |
| C    | -0.001 | 0.027  | 0.013  | 0.028  | 0.062  |
| H    | 0.023  | 0.025  | 0.024  | 0.002  | 0.290  |
| C    | -0.002 | 0.037  | 0.018  | 0.039  | 0.151  |
| C    | 0.099  | 0.030  | 0.064  | -0.069 | -0.173 |
| C    | -0.002 | 0.030  | 0.014  | 0.031  | 0.127  |
| C    | 0.099  | 0.043  | 0.071  | -0.057 | -0.135 |
| C    | 0.019  | 0.027  | 0.023  | 0.008  | -0.129 |
| N    | 0.026  | 0.026  | 0.026  | 0.001  | -0.365 |
| H    | 0.000  | 0.003  | 0.002  | 0.003  | 0.184  |
| H    | 0.009  | 0.010  | 0.009  | 0.001  | 0.201  |
| H    | 0.028  | 0.022  | 0.025  | -0.006 | 0.129  |
| H    | 0.019  | 0.016  | 0.018  | -0.003 | 0.125  |
| H    | 0.029  | 0.023  | 0.026  | -0.006 | 0.074  |
| H    | 0.022  | 0.024  | 0.023  | 0.002  | 0.078  |
| H    | 0.022  | 0.023  | 0.023  | 0.001  | 0.078  |
| H    | 0.026  | 0.020  | 0.023  | -0.006 | 0.084  |
| C    | 0.009  | 0.024  | 0.017  | 0.015  | 0.383  |
| O    | 0.024  | 0.038  | 0.031  | 0.014  | -0.400 |
| O    | 0.003  | 0.011  | 0.007  | 0.008  | -0.350 |
| H    | 0.016  | 0.020  | 0.018  | 0.004  | 0.326  |
| H    | 0.012  | 0.015  | 0.013  | 0.003  | 0.095  |
| H    | 0.014  | 0.015  | 0.014  | 0.001  | 0.091  |



Table 24: Mulliken condensed Fukui functions, dual descriptor, and Mulliken atomic charge for DSH0.

| Atom | $f^-$  | $f^+$  | $f^0$  | $f^d$  | Charge |
|------|--------|--------|--------|--------|--------|
| S    | 0.121  | 0.088  | 0.105  | -0.033 | 0.123  |
| H    | 0.026  | 0.023  | 0.025  | -0.003 | -0.038 |
| C    | 0.001  | 0.016  | 0.009  | 0.015  | -0.385 |
| C    | 0.048  | 0.048  | 0.048  | 0.000  | -0.133 |
| C    | -0.001 | 0.005  | 0.002  | 0.006  | 0.087  |
| C    | 0.069  | 0.077  | 0.073  | 0.007  | -0.136 |
| C    | -0.003 | -0.005 | -0.004 | -0.002 | 0.161  |
| C    | 0.060  | 0.068  | 0.064  | 0.008  | -0.085 |
| C    | 0.008  | 0.008  | 0.008  | 0.000  | 0.305  |
| C    | 0.015  | 0.012  | 0.014  | -0.003 | 0.026  |
| C    | 0.015  | 0.011  | 0.013  | -0.004 | -0.012 |
| C    | 0.005  | 0.003  | 0.004  | -0.002 | 0.253  |
| C    | 0.065  | 0.073  | 0.069  | 0.008  | -0.088 |
| C    | -0.005 | -0.008 | -0.007 | -0.003 | 0.177  |
| C    | 0.071  | 0.077  | 0.074  | 0.006  | -0.124 |
| C    | 0.001  | 0.009  | 0.005  | 0.007  | 0.086  |
| C    | 0.051  | 0.049  | 0.050  | -0.003 | -0.125 |
| C    | 0.002  | 0.016  | 0.009  | 0.014  | -0.357 |
| S    | 0.126  | 0.087  | 0.106  | -0.039 | 0.126  |
| H    | 0.027  | 0.023  | 0.025  | -0.004 | -0.039 |
| H    | 0.017  | 0.021  | 0.019  | 0.004  | 0.024  |
| C    | 0.010  | 0.007  | 0.008  | -0.003 | -0.129 |
| N    | 0.006  | 0.005  | 0.005  | -0.001 | -0.367 |
| H    | 0.002  | 0.004  | 0.003  | 0.002  | 0.204  |
| H    | 0.024  | 0.025  | 0.024  | 0.001  | 0.179  |
| C    | 0.009  | 0.007  | 0.008  | -0.002 | -0.131 |
| N    | 0.003  | 0.003  | 0.003  | 0.000  | -0.363 |
| H    | 0.005  | 0.006  | 0.005  | 0.000  | 0.203  |
| H    | 0.024  | 0.025  | 0.025  | 0.001  | 0.178  |
| H    | 0.013  | 0.018  | 0.015  | 0.004  | 0.006  |
| C    | 0.007  | 0.008  | 0.008  | 0.002  | 0.366  |
| O    | 0.020  | 0.022  | 0.021  | 0.002  | -0.387 |
| O    | 0.003  | 0.004  | 0.003  | 0.001  | -0.350 |
| H    | 0.014  | 0.015  | 0.015  | 0.001  | 0.327  |
| C    | 0.006  | 0.008  | 0.007  | 0.003  | 0.364  |
| O    | 0.019  | 0.022  | 0.021  | 0.002  | -0.383 |
| O    | 0.003  | 0.003  | 0.003  | 0.000  | -0.351 |
| H    | 0.014  | 0.015  | 0.015  | 0.001  | 0.327  |
| H    | 0.020  | 0.023  | 0.022  | 0.003  | 0.080  |
| H    | 0.015  | 0.017  | 0.016  | 0.002  | 0.081  |
| H    | 0.020  | 0.020  | 0.020  | 0.000  | 0.059  |
| H    | 0.020  | 0.020  | 0.020  | -0.001 | 0.061  |
| H    | 0.009  | 0.012  | 0.011  | 0.002  | 0.087  |
| H    | 0.012  | 0.012  | 0.012  | 0.001  | 0.090  |

Table 25: Mulliken condensed Fukui functions, dual descriptor, and Mulliken atomic charge for DSHN1.

| Atom | $f^-$  | $f^+$  | $f^0$  | $f^d$  | Charge |
|------|--------|--------|--------|--------|--------|
| S    | 0.074  | 0.070  | 0.072  | -0.004 | 0.123  |
| H    | 0.024  | 0.020  | 0.022  | -0.004 | -0.038 |
| C    | 0.028  | 0.010  | 0.019  | -0.018 | -0.385 |
| C    | 0.015  | 0.045  | 0.030  | 0.030  | -0.133 |
| N    | 0.006  | -0.015 | -0.004 | -0.021 | 0.087  |
| C    | 0.053  | 0.058  | 0.056  | 0.005  | -0.136 |
| C    | 0.001  | 0.030  | 0.015  | 0.029  | 0.161  |
| C    | 0.030  | 0.025  | 0.027  | -0.005 | -0.085 |
| C    | 0.032  | 0.026  | 0.029  | -0.006 | 0.305  |
| N    | 0.005  | -0.012 | -0.003 | -0.017 | 0.026  |
| C    | 0.014  | 0.051  | 0.032  | 0.037  | -0.012 |
| C    | 0.027  | 0.008  | 0.018  | -0.019 | 0.253  |
| C    | 0.056  | 0.050  | 0.053  | -0.007 | -0.088 |
| C    | -0.004 | 0.028  | 0.012  | 0.033  | 0.177  |
| C    | 0.003  | 0.034  | 0.019  | 0.031  | -0.124 |
| C    | 0.082  | 0.022  | 0.052  | -0.06  | 0.086  |
| C    | 0.004  | 0.028  | 0.016  | 0.024  | -0.125 |
| C    | 0.083  | 0.034  | 0.058  | -0.049 | -0.357 |
| S    | 0.074  | 0.068  | 0.071  | -0.005 | 0.126  |
| H    | 0.024  | 0.021  | 0.023  | -0.003 | -0.039 |
| C    | 0.018  | 0.025  | 0.021  | 0.007  | 0.024  |
| N    | 0.024  | 0.025  | 0.024  | 0.001  | -0.129 |
| H    | 0.001  | 0.003  | 0.002  | 0.002  | -0.367 |
| H    | 0.008  | 0.009  | 0.009  | 0.001  | 0.204  |
| C    | 0.013  | 0.017  | 0.015  | 0.003  | 0.179  |
| N    | -0.001 | -0.001 | -0.001 | -0.001 | -0.131 |
| H    | 0.010  | 0.011  | 0.010  | 0.001  | -0.363 |
| H    | 0.027  | 0.027  | 0.027  | 0.000  | 0.203  |
| H    | 0.027  | 0.022  | 0.024  | -0.005 | 0.178  |
| C    | 0.012  | 0.014  | 0.013  | 0.001  | 0.006  |
| O    | 0.025  | 0.025  | 0.025  | 0.000  | 0.366  |
| O    | 0.009  | 0.009  | 0.009  | 0.000  | -0.387 |
| H    | 0.016  | 0.016  | 0.016  | 0.000  | -0.350 |
| H    | 0.016  | 0.013  | 0.014  | -0.002 | 0.327  |
| H    | 0.025  | 0.02   | 0.023  | -0.005 | 0.364  |
| H    | 0.025  | 0.019  | 0.022  | -0.005 | -0.383 |
| H    | 0.020  | 0.019  | 0.019  | -0.001 | -0.351 |
| H    | 0.020  | 0.02   | 0.02   | 0.000  | 0.327  |
| C    | 0.009  | 0.019  | 0.014  | 0.010  | 0.080  |
| O    | 0.022  | 0.033  | 0.027  | 0.011  | 0.081  |
| O    | 0.003  | 0.008  | 0.006  | 0.005  | 0.059  |
| H    | 0.015  | 0.018  | 0.016  | 0.003  | 0.061  |
| H    | 0.013  | 0.014  | 0.013  | 0.001  | 0.087  |
| H    | 0.011  | 0.014  | 0.013  | 0.003  | 0.090  |

Table 26: Mulliken condensed Fukui functions, dual descriptor, and Mulliken atomic charge for DSHN2.

| Atom | $f^-$  | $f^+$  | $f^0$  | $f^d$  | Charge |
|------|--------|--------|--------|--------|--------|
| S    | 0.071  | 0.079  | 0.075  | 0.007  | 0.128  |
| H    | 0.030  | 0.027  | 0.029  | -0.003 | -0.043 |
| C    | 0.000  | 0.016  | 0.008  | 0.016  | -0.139 |
| C    | 0.060  | 0.023  | 0.042  | -0.037 | -0.139 |
| N    | 0.007  | 0.003  | 0.005  | -0.004 | -0.114 |
| C    | 0.016  | 0.051  | 0.033  | 0.035  | 0.369  |
| N    | -0.013 | 0.01   | -0.002 | 0.023  | -0.073 |
| C    | 0.025  | 0.020  | 0.023  | -0.005 | -0.104 |
| C    | 0.019  | 0.023  | 0.021  | 0.004  | -0.173 |
| C    | 0.008  | 0.014  | 0.011  | 0.006  | -0.061 |
| C    | 0.017  | 0.028  | 0.022  | 0.011  | 0.202  |
| C    | 0.047  | 0.036  | 0.042  | -0.011 | -0.130 |
| C    | 0.004  | 0.03   | 0.017  | 0.026  | 0.176  |
| C    | 0.066  | 0.027  | 0.046  | -0.039 | -0.233 |
| C    | 0.002  | 0.039  | 0.020  | 0.037  | 0.151  |
| C    | 0.097  | 0.036  | 0.066  | -0.061 | -0.153 |
| C    | -0.008 | 0.028  | 0.010  | 0.036  | 0.164  |
| C    | 0.116  | 0.034  | 0.075  | -0.082 | -0.207 |
| S    | 0.077  | 0.076  | 0.077  | -0.001 | 0.122  |
| H    | 0.018  | 0.022  | 0.02   | 0.004  | -0.045 |
| H    | 0.031  | 0.019  | 0.025  | -0.012 | 0.088  |
| H    | 0.015  | 0.022  | 0.018  | 0.006  | 0.073  |
| C    | 0.008  | 0.018  | 0.013  | 0.010  | -0.097 |
| N    | -0.003 | -0.006 | -0.004 | -0.003 | -0.386 |
| H    | 0.011  | 0.010  | 0.010  | -0.001 | 0.203  |
| H    | 0.031  | 0.027  | 0.029  | -0.004 | 0.174  |
| C    | 0.005  | 0.009  | 0.007  | 0.004  | 0.375  |
| O    | 0.022  | 0.021  | 0.022  | -0.001 | -0.393 |
| O    | 0.007  | 0.007  | 0.007  | 0.000  | -0.354 |
| H    | 0.016  | 0.014  | 0.015  | -0.001 | 0.326  |
| H    | 0.021  | 0.022  | 0.021  | 0.001  | 0.036  |
| H    | 0.021  | 0.021  | 0.021  | 0.000  | 0.066  |
| C    | 0.010  | 0.019  | 0.015  | 0.009  | -0.127 |
| N    | 0.002  | 0.003  | 0.003  | 0.001  | -0.361 |
| H    | 0.004  | 0.006  | 0.005  | 0.003  | 0.200  |
| H    | 0.023  | 0.026  | 0.024  | 0.003  | 0.178  |
| C    | 0.008  | 0.018  | 0.013  | 0.010  | 0.368  |
| O    | 0.021  | 0.032  | 0.027  | 0.011  | -0.386 |
| O    | 0.002  | 0.006  | 0.004  | 0.004  | -0.350 |
| H    | 0.014  | 0.018  | 0.016  | 0.004  | 0.326  |
| H    | 0.017  | 0.020  | 0.018  | 0.003  | 0.085  |
| H    | 0.031  | 0.021  | 0.026  | -0.010 | 0.077  |
| H    | 0.017  | 0.014  | 0.016  | -0.003 | 0.091  |
| H    | 0.010  | 0.013  | 0.012  | 0.004  | 0.090  |

Table 27: Mulliken condensed Fukui functions, dual descriptor, and Mulliken atomic charge for DSHN3.

| Atom | $f^-$  | $f^+$  | $f^0$  | $f^d$  | Charge |
|------|--------|--------|--------|--------|--------|
| S    | 0.072  | 0.078  | 0.075  | 0.006  | 0.150  |
| H    | 0.018  | 0.021  | 0.020  | 0.002  | -0.033 |
| C    | -0.005 | 0.020  | 0.007  | 0.025  | -0.104 |
| C    | 0.049  | 0.022  | 0.036  | -0.027 | -0.109 |
| N    | 0.005  | -0.007 | -0.001 | -0.012 | -0.089 |
| C    | 0.058  | 0.049  | 0.054  | -0.009 | -0.083 |
| C    | -0.004 | 0.031  | 0.013  | 0.035  | 0.165  |
| C    | 0.032  | 0.025  | 0.029  | -0.007 | 0.078  |
| C    | 0.031  | 0.023  | 0.027  | -0.008 | 0.088  |
| N    | 0.005  | -0.010 | -0.002 | -0.015 | -0.100 |
| C    | -0.005 | 0.018  | 0.007  | 0.023  | -0.085 |
| C    | 0.050  | 0.024  | 0.037  | -0.027 | -0.111 |
| C    | 0.057  | 0.056  | 0.056  | -0.001 | -0.082 |
| C    | -0.001 | 0.030  | 0.015  | 0.032  | 0.085  |
| C    | -0.002 | 0.034  | 0.016  | 0.036  | 0.162  |
| C    | 0.096  | 0.029  | 0.062  | -0.067 | -0.165 |
| C    | -0.002 | 0.029  | 0.014  | 0.031  | 0.139  |
| C    | 0.098  | 0.040  | 0.069  | -0.058 | -0.134 |
| S    | 0.073  | 0.076  | 0.075  | 0.003  | 0.139  |
| H    | 0.018  | 0.021  | 0.020  | 0.003  | -0.029 |
| C    | 0.017  | 0.024  | 0.020  | 0.008  | -0.122 |
| N    | 0.025  | 0.026  | 0.025  | 0.000  | -0.364 |
| H    | 0.000  | 0.002  | 0.001  | 0.002  | 0.184  |
| H    | 0.009  | 0.009  | 0.009  | 0.001  | 0.202  |
| H    | 0.021  | 0.015  | 0.018  | -0.005 | 0.001  |
| H    | 0.012  | 0.009  | 0.011  | -0.003 | -0.035 |
| C    | 0.012  | 0.015  | 0.014  | 0.004  | -0.109 |
| N    | 0.001  | 0.000  | 0.001  | -0.001 | -0.376 |
| H    | 0.009  | 0.010  | 0.009  | 0.001  | 0.204  |
| H    | 0.027  | 0.027  | 0.027  | 0.000  | 0.176  |
| C    | 0.013  | 0.014  | 0.013  | 0.001  | 0.355  |
| O    | 0.024  | 0.023  | 0.023  | 0.000  | -0.394 |
| O    | 0.009  | 0.009  | 0.009  | 0.000  | -0.352 |
| H    | 0.016  | 0.016  | 0.016  | 0.000  | 0.327  |
| H    | 0.026  | 0.021  | 0.024  | -0.005 | 0.075  |
| H    | 0.019  | 0.021  | 0.020  | 0.002  | 0.059  |
| H    | 0.019  | 0.020  | 0.020  | 0.002  | 0.060  |
| H    | 0.025  | 0.020  | 0.022  | -0.005 | 0.086  |
| C    | 0.009  | 0.019  | 0.014  | 0.010  | 0.382  |
| O    | 0.022  | 0.033  | 0.028  | 0.011  | -0.398 |
| O    | 0.003  | 0.008  | 0.006  | 0.005  | -0.349 |
| H    | 0.016  | 0.018  | 0.017  | 0.002  | 0.327  |
| H    | 0.012  | 0.014  | 0.013  | 0.002  | 0.087  |
| H    | 0.013  | 0.015  | 0.014  | 0.001  | 0.093  |

Table 28: Mulliken condensed Fukui functions, dual descriptor, and Mulliken atomic charge for LSH0.

| Atom | $f^-$  | $f^+$  | $f^0$  | $f^d$  | Charge |
|------|--------|--------|--------|--------|--------|
| S    | 0.121  | 0.088  | 0.105  | -0.033 | 0.124  |
| H    | 0.026  | 0.023  | 0.025  | -0.003 | -0.038 |
| C    | 0.001  | 0.016  | 0.009  | 0.015  | -0.385 |
| C    | 0.048  | 0.048  | 0.048  | 0.000  | -0.131 |
| C    | -0.002 | 0.004  | 0.001  | 0.006  | 0.087  |
| C    | 0.070  | 0.077  | 0.073  | 0.007  | -0.137 |
| C    | -0.003 | -0.005 | -0.004 | -0.002 | 0.160  |
| C    | 0.060  | 0.068  | 0.064  | 0.008  | -0.084 |
| C    | 0.008  | 0.008  | 0.008  | 0.000  | 0.305  |
| C    | 0.015  | 0.012  | 0.014  | -0.003 | 0.025  |
| C    | 0.015  | 0.011  | 0.013  | -0.004 | -0.012 |
| C    | 0.005  | 0.003  | 0.004  | -0.002 | 0.254  |
| C    | 0.065  | 0.072  | 0.068  | 0.007  | -0.088 |
| C    | -0.004 | -0.008 | -0.006 | -0.003 | 0.176  |
| C    | 0.071  | 0.077  | 0.074  | 0.006  | -0.121 |
| C    | 0.001  | 0.008  | 0.005  | 0.007  | 0.088  |
| C    | 0.051  | 0.049  | 0.05   | -0.003 | -0.127 |
| C    | 0.002  | 0.016  | 0.009  | 0.014  | -0.357 |
| S    | 0.126  | 0.087  | 0.106  | -0.039 | 0.127  |
| H    | 0.027  | 0.023  | 0.025  | -0.004 | -0.039 |
| H    | 0.017  | 0.022  | 0.019  | 0.004  | 0.023  |
| C    | 0.010  | 0.007  | 0.008  | -0.003 | -0.131 |
| N    | 0.005  | 0.005  | 0.005  | -0.001 | -0.366 |
| H    | 0.002  | 0.004  | 0.003  | 0.002  | 0.204  |
| H    | 0.024  | 0.025  | 0.024  | 0.001  | 0.179  |
| C    | 0.009  | 0.007  | 0.008  | -0.002 | -0.134 |
| N    | 0.002  | 0.003  | 0.003  | 0.000  | -0.361 |
| H    | 0.005  | 0.005  | 0.005  | 0.000  | 0.203  |
| H    | 0.024  | 0.025  | 0.025  | 0.001  | 0.178  |
| C    | 0.007  | 0.009  | 0.008  | 0.002  | 0.367  |
| O    | 0.021  | 0.022  | 0.022  | 0.002  | -0.387 |
| O    | 0.002  | 0.003  | 0.003  | 0.001  | -0.350 |
| H    | 0.014  | 0.015  | 0.015  | 0.001  | 0.328  |
| H    | 0.013  | 0.018  | 0.015  | 0.004  | 0.007  |
| C    | 0.006  | 0.009  | 0.007  | 0.003  | 0.365  |
| O    | 0.019  | 0.022  | 0.021  | 0.003  | -0.383 |
| O    | 0.004  | 0.003  | 0.003  | 0.000  | -0.352 |
| H    | 0.014  | 0.015  | 0.015  | 0.001  | 0.327  |
| H    | 0.020  | 0.023  | 0.021  | 0.003  | 0.079  |
| H    | 0.016  | 0.017  | 0.017  | 0.002  | 0.082  |
| H    | 0.020  | 0.020  | 0.02   | 0.000  | 0.059  |
| H    | 0.020  | 0.020  | 0.020  | -0.001 | 0.061  |
| H    | 0.009  | 0.012  | 0.010  | 0.002  | 0.087  |
| H    | 0.011  | 0.012  | 0.012  | 0.001  | 0.090  |

Table 29: Mulliken condensed Fukui functions, dual descriptor, and Mulliken atomic charge for LSHN1.

| Atom | $f^-$  | $f^+$  | $f^0$  | $f^d$  | Charge |
|------|--------|--------|--------|--------|--------|
| S    | 0.074  | 0.070  | 0.072  | -0.004 | 0.112  |
| H    | 0.024  | 0.020  | 0.022  | -0.004 | -0.051 |
| C    | 0.028  | 0.010  | 0.019  | -0.018 | -0.172 |
| C    | 0.015  | 0.045  | 0.030  | 0.030  | -0.075 |
| N    | 0.006  | -0.015 | -0.004 | -0.021 | -0.126 |
| C    | 0.053  | 0.058  | 0.056  | 0.005  | -0.099 |
| C    | 0.000  | 0.029  | 0.015  | 0.029  | 0.081  |
| C    | 0.030  | 0.025  | 0.027  | -0.005 | 0.093  |
| C    | 0.032  | 0.026  | 0.029  | -0.006 | 0.073  |
| N    | 0.005  | -0.012 | -0.003 | -0.017 | -0.116 |
| C    | 0.014  | 0.051  | 0.032  | 0.037  | -0.089 |
| C    | 0.027  | 0.008  | 0.018  | -0.019 | -0.175 |
| C    | 0.056  | 0.050  | 0.053  | -0.007 | -0.121 |
| C    | -0.004 | 0.028  | 0.012  | 0.033  | 0.159  |
| C    | 0.003  | 0.034  | 0.019  | 0.031  | 0.222  |
| C    | 0.082  | 0.023  | 0.053  | -0.059 | -0.109 |
| C    | 0.004  | 0.028  | 0.016  | 0.024  | 0.204  |
| C    | 0.083  | 0.034  | 0.058  | -0.049 | -0.098 |
| S    | 0.074  | 0.068  | 0.071  | -0.005 | 0.116  |
| H    | 0.024  | 0.021  | 0.023  | -0.003 | -0.050 |
| C    | 0.018  | 0.025  | 0.021  | 0.007  | -0.131 |
| N    | 0.025  | 0.026  | 0.025  | 0.001  | -0.365 |
| H    | 0.000  | 0.002  | 0.001  | 0.002  | 0.185  |
| H    | 0.008  | 0.009  | 0.009  | 0.001  | 0.203  |
| C    | 0.014  | 0.018  | 0.016  | 0.004  | -0.115 |
| N    | -0.001 | -0.002 | -0.001 | -0.001 | -0.373 |
| H    | 0.010  | 0.011  | 0.01   | 0.001  | 0.203  |
| H    | 0.027  | 0.027  | 0.027  | 0.000  | 0.177  |
| H    | 0.027  | 0.022  | 0.024  | -0.005 | 0.034  |
| C    | 0.012  | 0.014  | 0.013  | 0.001  | 0.355  |
| O    | 0.025  | 0.024  | 0.025  | 0.000  | -0.396 |
| O    | 0.009  | 0.009  | 0.009  | 0.000  | -0.351 |
| H    | 0.016  | 0.016  | 0.016  | 0.000  | 0.328  |
| H    | 0.016  | 0.013  | 0.014  | -0.002 | 0.066  |
| H    | 0.025  | 0.021  | 0.023  | -0.004 | 0.082  |
| H    | 0.024  | 0.019  | 0.022  | -0.005 | 0.028  |
| H    | 0.020  | 0.019  | 0.019  | -0.001 | 0.067  |
| H    | 0.020  | 0.020  | 0.020  | 0.000  | 0.071  |
| C    | 0.009  | 0.018  | 0.014  | 0.009  | 0.385  |
| O    | 0.022  | 0.032  | 0.027  | 0.011  | -0.395 |
| O    | 0.003  | 0.009  | 0.006  | 0.005  | -0.353 |
| H    | 0.015  | 0.018  | 0.016  | 0.003  | 0.329  |
| H    | 0.013  | 0.014  | 0.013  | 0.001  | 0.095  |
| H    | 0.012  | 0.014  | 0.013  | 0.003  | 0.091  |

Table 30: Mulliken condensed Fukui functions, dual descriptor, and Mulliken atomic charge for LSHN2.

| Atom | $f^-$  | $f^+$  | $f^0$  | $f^d$  | Charge |
|------|--------|--------|--------|--------|--------|
| S    | 0.071  | 0.079  | 0.075  | 0.007  | 0.128  |
| H    | 0.031  | 0.027  | 0.029  | -0.003 | -0.043 |
| C    | 0.000  | 0.015  | 0.008  | 0.016  | -0.139 |
| C    | 0.060  | 0.023  | 0.041  | -0.037 | -0.139 |
| N    | 0.006  | 0.003  | 0.005  | -0.003 | -0.114 |
| C    | 0.016  | 0.051  | 0.033  | 0.035  | 0.368  |
| N    | -0.013 | 0.01   | -0.002 | 0.023  | -0.073 |
| C    | 0.025  | 0.020  | 0.022  | -0.005 | -0.104 |
| C    | 0.019  | 0.023  | 0.021  | 0.004  | -0.173 |
| C    | 0.008  | 0.014  | 0.011  | 0.006  | -0.061 |
| C    | 0.017  | 0.028  | 0.022  | 0.011  | 0.202  |
| C    | 0.047  | 0.035  | 0.041  | -0.012 | -0.130 |
| C    | 0.004  | 0.03   | 0.017  | 0.026  | 0.176  |
| C    | 0.066  | 0.027  | 0.046  | -0.039 | -0.232 |
| C    | 0.002  | 0.039  | 0.020  | 0.037  | 0.152  |
| C    | 0.097  | 0.036  | 0.066  | -0.061 | -0.153 |
| C    | -0.009 | 0.028  | 0.009  | 0.036  | 0.164  |
| C    | 0.115  | 0.034  | 0.074  | -0.082 | -0.206 |
| S    | 0.077  | 0.076  | 0.077  | -0.001 | 0.122  |
| H    | 0.018  | 0.022  | 0.02   | 0.004  | -0.045 |
| H    | 0.031  | 0.019  | 0.025  | -0.012 | 0.087  |
| H    | 0.015  | 0.022  | 0.019  | 0.007  | 0.073  |
| C    | 0.007  | 0.017  | 0.012  | 0.010  | -0.097 |
| N    | -0.003 | -0.006 | -0.004 | -0.003 | -0.385 |
| H    | 0.011  | 0.010  | 0.010  | -0.001 | 0.203  |
| H    | 0.031  | 0.027  | 0.029  | -0.004 | 0.174  |
| C    | 0.005  | 0.009  | 0.007  | 0.004  | 0.375  |
| O    | 0.022  | 0.021  | 0.022  | -0.001 | -0.393 |
| O    | 0.007  | 0.007  | 0.007  | 0.000  | -0.354 |
| H    | 0.016  | 0.014  | 0.015  | -0.001 | 0.326  |
| H    | 0.021  | 0.022  | 0.021  | 0.001  | 0.035  |
| H    | 0.021  | 0.021  | 0.021  | 0.000  | 0.066  |
| C    | 0.010  | 0.019  | 0.014  | 0.009  | -0.128 |
| N    | 0.002  | 0.003  | 0.003  | 0.001  | -0.361 |
| H    | 0.004  | 0.007  | 0.005  | 0.003  | 0.200  |
| H    | 0.023  | 0.026  | 0.024  | 0.003  | 0.178  |
| C    | 0.008  | 0.018  | 0.013  | 0.010  | 0.368  |
| O    | 0.021  | 0.032  | 0.027  | 0.011  | -0.386 |
| O    | 0.002  | 0.006  | 0.004  | 0.004  | -0.350 |
| H    | 0.014  | 0.018  | 0.016  | 0.004  | 0.326  |
| H    | 0.017  | 0.020  | 0.018  | 0.003  | 0.085  |
| H    | 0.032  | 0.021  | 0.026  | -0.010 | 0.077  |
| H    | 0.017  | 0.014  | 0.016  | -0.003 | 0.090  |
| H    | 0.010  | 0.014  | 0.012  | 0.004  | 0.090  |

Table 31: Mulliken condensed Fukui functions, dual descriptor, and Mulliken atomic charge for LSHN3.

| Atom | $f^-$  | $f^+$  | $f^0$  | $f^d$  | Charge |
|------|--------|--------|--------|--------|--------|
| C    | 0.009  | 0.019  | 0.014  | 0.010  | 0.382  |
| O    | 0.022  | 0.033  | 0.028  | 0.011  | -0.398 |
| O    | 0.003  | 0.008  | 0.005  | 0.006  | -0.349 |
| H    | 0.016  | 0.018  | 0.017  | 0.003  | 0.327  |
| C    | 0.017  | 0.025  | 0.021  | 0.008  | -0.123 |
| N    | 0.025  | 0.025  | 0.025  | 0.000  | -0.364 |
| H    | 0.000  | 0.002  | 0.001  | 0.002  | 0.184  |
| H    | 0.009  | 0.009  | 0.009  | 0.001  | 0.202  |
| C    | -0.002 | 0.030  | 0.014  | 0.032  | 0.085  |
| C    | 0.057  | 0.057  | 0.057  | 0.000  | -0.084 |
| C    | 0.095  | 0.028  | 0.062  | -0.066 | -0.166 |
| C    | -0.002 | 0.035  | 0.017  | 0.036  | 0.163  |
| C    | 0.049  | 0.022  | 0.035  | -0.027 | -0.109 |
| C    | -0.005 | 0.020  | 0.008  | 0.025  | -0.105 |
| N    | 0.005  | -0.007 | -0.001 | -0.012 | -0.090 |
| C    | 0.030  | 0.023  | 0.027  | -0.008 | 0.089  |
| C    | 0.032  | 0.025  | 0.029  | -0.007 | 0.081  |
| C    | -0.001 | 0.029  | 0.014  | 0.030  | 0.138  |
| C    | 0.096  | 0.039  | 0.068  | -0.058 | -0.133 |
| C    | -0.004 | 0.031  | 0.013  | 0.035  | 0.162  |
| C    | 0.058  | 0.049  | 0.053  | -0.009 | -0.084 |
| C    | 0.051  | 0.025  | 0.038  | -0.027 | -0.110 |
| C    | -0.005 | 0.018  | 0.006  | 0.022  | -0.087 |
| N    | 0.005  | -0.010 | -0.002 | -0.015 | -0.103 |
| C    | 0.012  | 0.016  | 0.014  | 0.003  | -0.108 |
| N    | 0.001  | 0.000  | 0.000  | -0.001 | -0.376 |
| H    | 0.027  | 0.027  | 0.027  | 0.000  | 0.176  |
| H    | 0.009  | 0.010  | 0.010  | 0.001  | 0.204  |
| C    | 0.012  | 0.014  | 0.013  | 0.001  | 0.355  |
| O    | 0.023  | 0.023  | 0.023  | 0.000  | -0.394 |
| O    | 0.009  | 0.009  | 0.009  | 0.000  | -0.352 |
| S    | 0.072  | 0.079  | 0.075  | 0.007  | 0.151  |
| S    | 0.073  | 0.076  | 0.074  | 0.003  | 0.137  |
| H    | 0.016  | 0.016  | 0.016  | 0.000  | 0.328  |
| H    | 0.021  | 0.015  | 0.018  | -0.006 | 0.007  |
| H    | 0.012  | 0.009  | 0.011  | -0.003 | -0.033 |
| H    | 0.019  | 0.021  | 0.020  | 0.002  | 0.060  |
| H    | 0.019  | 0.021  | 0.020  | 0.001  | 0.060  |
| H    | 0.027  | 0.022  | 0.024  | -0.006 | 0.076  |
| H    | 0.025  | 0.020  | 0.022  | -0.005 | 0.086  |
| H    | 0.013  | 0.015  | 0.014  | 0.001  | 0.094  |
| H    | 0.011  | 0.014  | 0.013  | 0.002  | 0.088  |
| H    | 0.018  | 0.022  | 0.020  | 0.003  | -0.031 |
| H    | 0.018  | 0.021  | 0.020  | 0.002  | -0.034 |
